1 Excess dietary sugar impairs colonic epithelial regeneration in response to  
2 damage.

3 Ansen H.P. Burr<sup>1,2</sup>, Junyi Ji<sup>1,3</sup>, Kadir Ozler<sup>6</sup>, Onur Eskiocak<sup>6</sup>, Brian Yueh<sup>6</sup>, Ashley V. Menk<sup>5</sup>, Ana  
4 S.H. Costa<sup>6</sup>, Natalie Rittenhouse<sup>1</sup>, Chris W. Marshall<sup>4</sup>, Pailin Chiaranunt<sup>1</sup>, Lauren Mullinax<sup>1</sup>,  
5 Abigail Overacre-Delgoffe<sup>1</sup>, Vaughn S. Cooper<sup>4</sup>, Amanda C. Poholek<sup>1,2</sup>, Greg M. Delgoffe<sup>2,5</sup>,  
6 Semir Beyaz<sup>6</sup>, Timothy W. Hand<sup>1,2</sup>

7 <sup>1</sup> R.K. Mellon Institute for Pediatric Research, Pediatrics Department, Infectious Disease  
8 Section, UPMC Children's Hospital of Pittsburgh, University of Pittsburgh, Pittsburgh PA, 15224.

9 <sup>2</sup> Department of Immunology, University of Pittsburgh, School of Medicine, Pittsburgh PA,  
10 15261.

11 <sup>3</sup> School of Medicine, Tsinghua University, Beijing, 100084, China.

12 <sup>4</sup> Department of Microbiology, University of Pittsburgh, School of Medicine, Pittsburgh PA,  
13 15261.

14 <sup>5</sup> Tumor Microenvironment Center, UPMC Hillman Cancer Center, Pittsburgh PA 15232.

15 <sup>6</sup> Cold Spring Harbor Laboratory, Cold Spring Harbor, NY, 11724.

16 \* Corresponding author: Timothy W. Hand

17

18 **CA email:** [timothy.hand@chp.edu](mailto:timothy.hand@chp.edu)

19 **Abstract:**

20 The colonic epithelium requires continuous renewal by intestinal stem cells (ISCs) to restore the  
21 barrier after damage and proliferation of epithelial cells is modulated by dietary metabolites. We  
22 demonstrate that mice fed a high sugar diet failed to repair colonic barrier damage, resulting in  
23 increased intestinal pathology. Culturing ISCs in excess sugar limited murine and human

24 colonoid development, indicating that dietary sugar can directly affect colonic epithelial  
25 proliferation. Similarly, *in vivo* lineage tracing experiments and transcriptomic analysis indicated  
26 that dietary sugar impeded the proliferative potential of ISCs. ISCs and their immediate  
27 daughter cells predominantly rely on mitochondrial respiration for energy; however, metabolic  
28 analysis of colonic crypts revealed that a high sugar diet primed the epithelium for glycolysis  
29 without a commensurate increase in aerobic respiration. Colonoids cultured in high-glucose  
30 conditions accumulated glycolytic metabolites but not TCA cycle intermediates, indicating that  
31 the two metabolic pathways may not be coupled in proliferating intestinal epithelium.  
32 Accordingly, biochemically inducing pyruvate flux through the TCA cycle by inhibiting pyruvate  
33 dehydrogenase kinase rescued sugar-impaired colonoid development. Our results indicate that  
34 excess dietary sugar can directly inhibit epithelial proliferation in response to damage and may  
35 inform diets that better support the treatment of acute intestinal injury.

36

### 37 **Introduction:**

38

39 The modern diet of High-Income Countries is characterized by increased consumption of dietary  
40 fats and sugar, especially “acellular sugar” or simple carbohydrates that are readily absorbed by  
41 the host without additional digestive processing (Grundy et al., 2016; Monteiro, Moubarac,  
42 Cannon, Ng, & Popkin, 2013; Spreadbury, 2012). Indeed, the rate of sugar consumption has  
43 increased by 127% in the last 40 years, a trend that closely follows the rise in incidence of  
44 Inflammatory Bowel Disease (IBD) (Kearney, 2010). Diet is an important contributor to the  
45 development of IBD as epidemiological studies have found a positive association of IBD and  
46 high consumption of dietary sugar and sweetened beverages (Hou, Abraham, & El-Serag, 2011;  
47 Racine et al., 2016; Thornton, Emmett, & Heaton, 1979). Mice that consume a diet high in sugar  
48 have worse disease in models of colitis and clinical trials that significantly reduce dietary sugar

49 have already shown promise in reducing disease burden in IBD patients in the pediatric  
50 intensive care unit (Laffin et al., 2019; Obih et al., 2016; Yeh et al., 2019). However, the  
51 mechanism behind this correlation remains unknown.

52

53 The intestinal barrier is exposed to billions of microorganisms, dietary products and their  
54 metabolites every day. To prevent barrier-failure and bacteremia, the intestinal epithelium is  
55 renewed every 3 to 5 days by the proliferative function of Lgr5<sup>+</sup> intestinal stem cells (ISC) (N  
56 Barker et al., 2008; Nick Barker et al., 2007). ISCs reside at the base of crypts and  
57 asymmetrically divide to self-renew and to generate Transit Amplifying cells (TAs), which rapidly  
58 divide as they move up the crypt and differentiate into mature epithelial subsets such as goblet  
59 cells, enteroendocrine cells, and absorptive enterocytes (Bjerknes & Cheng, 1999; Cheng &  
60 Leblond, 1974). Rapid proliferation of crypts is particularly important after intestinal damage  
61 (Potten, 1990).

62

63 Diet-derived metabolites have been shown to directly alter both the proliferation and ‘stemness’  
64 of ISCs. For example, calorie restriction leads to expansion of the ISC population and a  
65 reduction in other epithelial subsets, suggesting a preference for symmetric division rather than  
66 differentiation (Yilmaz et al., 2012). In contrast, a high fat diet increases both the self-renewal  
67 and proliferation capacity of ISCs due to a metabolic preference for fatty acid oxidation and  
68 aerobic respiration by TAs (Beyaz et al., 2016; Fan et al., 2015). The intestine is home to a  
69 large and diverse microbiota that aids in the digestion of food, in particular, the breakdown of  
70 fiber into short chain fatty acids (SCFA) which are also an important carbon source and fuel for  
71 fatty acid oxidation in the intestinal epithelium (Kelly et al., 2015; J. M. W. Wong, de Souza,  
72 Kendall, Emam, & Jenkins, 2006). Elucidating how our diet both directly and indirectly affects

73 ISC function may have important implications for understanding how the intestine heals after  
74 damage caused by infection, Inflammatory Bowel Diseases (IBD) or after radiation therapy.

75  
76 We show in a mouse model of intestinal damage (dextran sulfate sodium, DSS) (Chassaing,  
77 Aitken, Malleshappa, & Vijay-Kumar, 2014) that a high sugar diet induces worse colonic disease  
78 when compared to a high fiber diet and that excess sugar directly impairs the growth of  
79 intestinal stem cells cultured *in vitro*. Transcriptome and imaging data confirmed that high sugar  
80 diet inhibits the proliferation of ISCs and their crypt-resident daughter cells and that this  
81 phenotype is exacerbated by DSS-induced damage. Metabolic analysis of intestinal crypt cells  
82 showed that a HS diet skewed them towards glycolysis without a requisite 'coupled' increase in  
83 aerobic respiration. Indeed, forcing a coupling of glycolysis and the TCA cycle with the pyruvate  
84 dehydrogenase kinase inhibitor, DCA, restored the proliferative function of colonoids growing  
85 under high sugar concentrations. Together, these studies elucidate the potentially damaging  
86 effects a high sugar diet may have on the regenerative capacity of the intestinal epithelium after  
87 injury.

88

## 89 **Results:**

90

### 91 **High sugar diet leads to lethal colonic damage when treated with DSS.**

92 To determine the effect of excess dietary sugar on a murine model of intestinal damage, we fed  
93 C57BL/6 mice one of two defined diets: 1) high sugar (HS, 68%kcal from sucrose) or 2) high fiber  
94 diet (HF, 68%kcal from high amylose cornstarch) where macronutrient levels are equalized and  
95 differ only in the predominant source of carbohydrates (Table S1). Mice were fed a defined diet  
96 for two weeks then exposed to 3% dextran sodium sulfate (DSS) drinking water for one week.  
97 Compared with HF-fed and standard diet-fed (Std, chow in facility that is similar in composition to  
98 HF, see Table S1) controls, mice fed a HS diet had significantly greater weight loss and nearly

99 100% mortality by day 7 of DSS administration (Fig. 1 A and B). As weight loss is not the only,  
100 nor the best, indicator of intestinal damage, histological analysis demonstrated that, compared to  
101 HF or Std diet-fed mice, DSS-treated, HS-fed mice exhibited massive immune infiltration and loss  
102 of crypt structure in the colonic lamina propria by day 6 of DSS treatment (Fig. 1 C and D). This  
103 level of damage is normally seen at day 8-10 of DSS treatment, suggesting excess dietary sugar  
104 is accelerating disease progression (Nunes et al., 2018). Importantly, diet alone did not  
105 significantly alter the weights of diet-treated mice nor the amount of water consumed by each  
106 group, eliminating the possibility that weight loss was due to insufficient nutrition or greater DSS  
107 consumption (Fig. S1 A and B).

108  
109 Sucrose is composed of two monosaccharides, glucose and fructose, which are differentially  
110 metabolized and absorbed in the intestine. We observed similar weight loss and lethal disease in  
111 mice drinking water supplemented with fructose, glucose or sucrose (10% by mass) when treated  
112 with DSS (Fig. S1C). Glucose appeared to have the most severe effects, with greater weight loss  
113 and mortality (Fig. S1C). However, all mice given sweetened water succumbed to DSS, while  
114 mice given unsweetened water lost less weight and recovered from colonic damage (Fig. S1D).  
115 However, mice prefer sweetened water (Sclafani, Zukerman, & Ackroff, 2014), and thus drink  
116 more sugar-sweetened water, which confounds interpretation of these experiments (Fig. S1B).  
117 Therefore, we focused on using HS and HF diets, where we have not observed differential water  
118 uptake and we can directly observe the effect of excess dietary sugar on the colonic response to  
119 damage (Fig. S1B).

120  
121 **High sugar diet does not significantly alter the composition of the intestinal microbiome.**  
122 We postulated that sugar may be altering the intestinal microbiota of HS-fed mice by expanding  
123 the population of *Enterobacteriaceae*, which can thrive on simple carbohydrates (Ayres, Trinidad,  
124 & Vance, 2012; Kamada, Chen, Inohara, & Núñez, 2013). Although 16S rRNA-sequencing of

125 fecal samples showed that defined diets altered the intestinal microbiota compared to mice fed  
126 the standard diet (Std), there was no significant difference between the microbiota of HS- or HF-  
127 fed mice after two weeks of consuming their defined diets as determined by measurement of  
128 diversity, Principal Coordinate and LEfSe analysis (Fig. 2 A-C and data not shown). Seven days  
129 after inflammation was introduced with DSS, we observed an outgrowth of *Enterobacteraceae*  
130 and *Enterococcaceae* in the microbiota of HS-fed mice (Fig. 2D). However, these same bacterial  
131 taxa are expanded under a variety of inflammatory intestinal conditions of varying severity, and  
132 thus are unlikely to be the sole cause of the rapid failure of the colonic epithelium seen in DSS-  
133 treated HS-fed mice (Lupp et al., 2007; Winter et al., 2013). Further, mice receiving sugar in their  
134 water bottle succumbed to DSS treatment but did not exhibit the same outgrowth of  
135 *Enterobacteraceae* and *Enterococcaceae*, indicating that it is not necessary for lethal sequelae  
136 (Fig. 2D). To test whether shifts in the microbiome of HS-fed mice exacerbated DSS-colitis, we  
137 transferred the fecal microbiome from HS-fed mice and from HF-fed mice into germ-free mice  
138 receiving standard chow and treated each group with DSS. Mice receiving the HS microbiota  
139 showed decreased survival compared to germ-free mice that received HF microbiota (Fig. 2 E-  
140 F). However, mice that received the microbiota from HS-fed mice did not lose weight as quickly  
141 as HS-fed mice and had increased length of survival, suggesting that the microbiota is not  
142 sufficient to induce the acute negative effects of excess dietary sugar. In previous studies, both a  
143 fiber-free diet and drinking water supplemented with sugar contributed to the expansion of mucus  
144 degrading bacteria and increased their susceptibility to colonic bacterial infection (Desai et al.,  
145 2016; Khan et al., 2020). In our experiments, despite HS diet containing low levels of fiber, the

146 frequency of *Akkermansia spp.* did not discriminate HS or HF-fed mice and thus could not explain  
147 the phenotype of DSS-treated HS-fed mice (Fig. 2G).

148

149 **Short chain fatty acid supplementation cannot prevent lethal complications of DSS-colitis**  
150 **in sugar-fed mice.**

151 Short chain fatty acids (SCFA) are an important microbiome-derived byproduct of dietary fiber  
152 that are absorbed by the host to provide nutrients to colonocytes, support the expansion of T  
153 regulatory cells, and dampen inflammation derived from innate immune cells (Donohoe et al.,  
154 2011; Furusawa et al., 2013; Kelly et al., 2015; J. M. W. Wong et al., 2006). Given the HS diet  
155 has less fiber, it may provide fewer SCFAs to the host. However, the addition of SCFA in the  
156 water of HS-fed mice did not save them from lethal colitis (Fig. 2 H and I). To ensure that SCFA  
157 were targeted specifically to the colon, rather than getting absorbed entirely by the small intestine,  
158 we also supplemented the HS diet with tributyrin (TB), which is broken down into butyrate and  
159 absorbed in the colon (Byndloss et al., 2017; Kelly et al., 2015). Tributyrin supplementation also  
160 did not rescue the HS-fed mice as they exhibited the same weight loss and lethality as mice on  
161 HS diet alone (Fig. 2 H and I), suggesting that it is not the relative lack of fiber and SCFA  
162 byproducts that is detrimental to colonic health during intestinal damage in our model, but the  
163 excess sugar.

164

165 **Short-term high sugar diet does not increase blood sugar or intestinal permeability.**

166 Excess dietary sugar has been linked to systemic diseases, such as diabetes, and elevated blood  
167 glucose can lead to impaired intestinal integrity (Thaiss et al., 2018). However, after two weeks  
168 of consuming the defined diets, we detected no differences in the fasted or post-prandial blood  
169 glucose levels (Fig. S2 A and B) or in intestinal permeability of HS or HF-fed mice prior to DSS

170 treatment (Fig. S2C). Therefore, high levels of blood glucose and altered intestinal permeability  
171 could not explain the increased susceptibility of HS-fed mice to intestinal damage.

172

173 **Dietary sugar must be present during colonic damage for lethal disease and can be**  
174 **absorbed by the colonic epithelium.**

175 We next hypothesized that if sugar was directly affecting the epithelium, then HS diet may need  
176 to coincide with DSS-induced intestinal damage. To test this, we fed mice Std or HS diet for 2  
177 weeks then reversed the diets on the first day of DSS treatment. Mice that were fed HS diet for 2  
178 weeks and switched to the Std diet with the initiation of DSS lost weight similar to the group fed  
179 Std diet throughout, while mice fed Std diet and switched to HS diet during DSS treatment lost  
180 weight similar to the group fed HS throughout the experiment (Fig. S2D). Therefore, excess sugar  
181 must be present contemporaneously to exacerbate DSS-induced disease. To directly test whether  
182 the colonic epithelium can absorb luminal glucose we utilized Lgr5 reporter mice (*Lgr5<sup>EGFP-cre-ERT2</sup>*)  
183 and fluorescently labelled glucose model (GlucoseCy5) (Watson et al., 2021). With this approach,  
184 we detected colonic epithelial uptake of fluorescent glucose introduced via enema that reached  
185 the Lgr5<sup>+</sup> colonic stem cells, suggesting that crypt cells can directly uptake luminal glucose (Fig.  
186 S2E). The function of the colon is to remove water and electrolytes while the absorption of  
187 nutrients and metabolites is performed by the small intestine. These functional differences are  
188 demonstrated by the expression of glucose transporters, as the colonic epithelium only expresses  
189 glucose transporters that bring glucose into the cell from the lumen (*Slc5a1*; SGLT1) and from  
190 the blood (*Slc2a1*; GLUT1), whereas the small intestinal epithelium also expresses GLUT2  
191 (*Slc2a2*), the bi-directional glucose transporter that exports glucose out of the cell and into the  
192 bloodstream (Fig. S2F) (Röder et al., 2014; Wang et al., 2020; Yoshikawa et al., 2011). Thus, the



193 colonic epithelium is unable to shuttle glucose out of the cell by the canonical pathway and the  
194 colon is likely a final destination for absorbed sugar.

195

196 **Excess sugar impairs development of colonoids *in vitro*.**

197 To determine the direct impact of excess sugar on the function and development of colonic  
198 epithelium, we utilized murine colonoids, 3-dimensional epithelial structures that are generated  
199 from colonic crypts isolated from mice. We found that culturing crypts into colonoids in 50mM or  
200 more of sucrose, fructose or glucose led to fewer and smaller colonoids that had decreased  
201 viability compared to cells cultured in 12.5mM of sugar, in a dose-dependent manner (Fig. 3 A  
202 and B). Reduced colonoid growth was not due to osmotic pressure as fully developed colonoids  
203 were viable when cultured in greater than 100mM of sucrose, fructose or glucose (Fig. S3, A-C).  
204 Similar results were observed with human colonoids, where colonoids that had been dispersed  
205 and regrown had inhibited growth into robust colonoid structures when exposed to high sugar  
206 concentrations, while fully developed human colonoids had no change in viability or number (Fig.  
207 3 C and D and Fig. S3 D and E). These results demonstrate a direct impairment of epithelial  
208 development and proliferation in high sugar conditions, both in mouse and human colonoids, that  
209 acts independently of the microbiome and local immune cells.

210

211 **Excess dietary sugar impairs the epithelial proliferative response to damage.**

212 To confirm if HS diet similarly alters the regeneration of the colonic epithelium *in vivo*, we  
213 measured the transcriptome (RNAseq) of the colonic epithelium from *Rag1*<sup>-/-</sup> mice (to ensure no  
214 intraepithelial lymphocyte contamination) fed HS or HF diet for 2 weeks. Critically, B and T cells  
215 are not required for the effects of HS diet as *Rag1*<sup>-/-</sup> mice phenocopy C57BL/6 mice after treatment  
216 with 3% DSS (Fig. S4 A and B). With diet alone, there were few transcriptional changes when  
217 comparing the intestinal epithelium of HS and HF-fed mice (Fig. 4A and Fig. S4 C and D). In  
218 contrast, after 3 days of DSS-induced damage, the transcriptome of the colonocytes from DSS-

219 treated, HS-fed mice showed a reduction in the expression of the core gene signatures of *Lgr5*<sup>+</sup>  
220 ISCs, TA cells, and secretory goblet cells, compared to DSS-treated HF-fed mice (Fig. 4A and  
221 Fig. S4 E and F). The genes associated with enteroendocrine cells were not substantially affected,  
222 indicating that the effect of HS diet is selective to specific epithelial cell types (Fig. 4A). These  
223 results were confirmed using Gene Set Enrichment Analysis (GSEA) which demonstrated an  
224 enrichment for *Lgr5*<sup>+</sup> intestinal stem cell signature in DSS treated HF-fed epithelium compared to  
225 DSS-treated HS epithelium as well as enrichment in gene sets involved in cell cycle progression  
226 and proliferation, including E2F targets, G2M checkpoint genes, Myc targets, Cell Cycle genes,  
227 DNA repair and Mitotic spindle gene sets (Fig. 4B and Fig. S4G) (Muñoz et al., 2012). In contrast,  
228 epithelium from HS-fed DSS-treated mice showed an enrichment for the Epithelial-Mesenchymal  
229 transition gene set, which is a characteristic process of Crohn's Disease, a subset of IBD, leading  
230 to fibrosis and stricturing (Fig. S4G). Typically, *Lgr5* expression and function is reduced by day 7  
231 of DSS treatment, yet HS-fed mice exhibit a loss of *Lgr5* expression by day 3 of DSS treatment,  
232 indicating that dietary sugar accelerates disease progression in this model (Fig. 4 A and B)  
233 (Harnack et al., 2019). HS/DSS-treated mice also display reduced *Atoh1* expression which may  
234 indicate impaired production of the earliest secretory-progenitor cells from *Lgr5*<sup>+</sup> ISCs in these  
235 mice (Fig. 4A). Proliferation is required to restore damaged epithelium, therefore we hypothesized  
236 that sugar may be impairing the regenerative response of the epithelium. Indeed, colonic  
237 epithelium from HS-fed mice expressed lower levels of the proliferative marker Ki67 after 3 days  
238 of DSS exposure and had fewer total epithelial cells by day 4 of DSS treatment, suggesting an  
239 impaired proliferative response when exposed to DSS-damage (Fig. 4 C-E). Additionally, we  
240 observed no differences in TUNEL and activated Caspase-3 staining after 3 days of DSS

241 treatment, indicating that HS diet was not increasing cell death in the colonic epithelium (Fig. S5  
242 A-C).

243

#### 244 **High sugar diet reduces proliferative potential of Lgr5<sup>+</sup> colonic epithelium.**

245 Given the reduction in transcripts associated with Lgr5<sup>+</sup> ISCs and TA cells, we postulated that HS  
246 diet was specifically affecting these critical cells and their proliferative capacity. Using *Lgr5<sup>eGFP-Cre-ERT2</sup>*  
247 reporter mice, we isolated Lgr5<sup>+</sup> stem cells and their immediate daughter cells (which retain  
248 low expression of Lgr5) for RNAseq after 2 weeks of HS or HF diet (Nick Barker et al., 2007).  
249 Similar to the total epithelium, Lgr5<sup>+</sup> ISCs from HF-fed mice were only modestly different from  
250 ISCs from HS-fed at the level of the whole transcriptome, but showed much more substantial  
251 enrichment in the expression of proliferation-related genes targeted by Myc and E2F. In contrast,  
252 Lgr5<sup>+</sup> ISCs from HS-fed mice showed a clear reduction in many of the cell cycle genes that  
253 comprise the TA cell gene signature, suggesting that a HS diet reduces the proliferative capacity  
254 of ISCs and their daughter cells prior to the induction of damage (Fig. 4 F and G and Fig. S5 D  
255 and E). Lineage tracing of Lgr5<sup>+</sup> daughter cells (from *Lgr5<sup>eGFP-Cre-ERT2</sup>/Rosa<sup>LSL-TdTomato</sup>* mice)  
256 showed that HS-diet, DSS-treated mice showed reduced cell migration up the crypt wall, as  
257 indicated by the distance and relative position of tamoxifen-activated Tomato<sup>+</sup> cells from GFP<sup>+</sup>  
258 ISCs located at the base of the crypt (Fig. 4 H and I and Fig S5F).

259

#### 260 **Excess dietary sugar alters colonic crypt metabolism, increasing spare respiratory 261 capacity and glycolytic response to a glucose challenge.**

262 It was unclear how our HS diet might affect the proliferation of ISCs, but altering sugar  
263 concentrations can modify cell metabolism and thereby proliferation rates (Palmer, Ostrowski,  
264 Balderson, Christian, & Crowe, 2015). To test how a HS diet might affect the metabolism of ISCs  
265 and their daughters, we isolated crypts and analyzed their glycolytic and respiratory rates (Fan et  
266 al., 2015). Colonic crypts isolated from HS or HF-fed mice only modestly differed in their basal

267 aerobic respiration (oxygen consumption rate; OCR) or anaerobic respiration (extracellular  
268 acidification rate; ECAR), but as expected, displayed a high reliance on aerobic respiration as  
269 demonstrated by a high OCR:ECAR ratio (Fig. 5A and Fig. S6 A-D). Crypts from HS-fed mice  
270 showed a significant increase in the difference between basal and maximal oxidative rates,  
271 termed spare respiratory capacity (SRC; as determined by uncoupling ATP synthesis from the  
272 electron transport chain with FCCP to maximize oxygen consumption) (Fig. 5A). High SRC levels  
273 are associated with high Complex II activity, and likely reflects unused aerobic respiration capacity  
274 in crypts from HS-fed mice (Pfleger, He, & Abdellatif, 2015). We next carried out a glucose stress  
275 test to measure the glycolytic capacity of crypts isolated from HS or HF-fed mice. This assay  
276 begins with 3 hours of glucose deprivation to remove effects of stored glucose. Interestingly,  
277 crypts from HS-fed mice were still able to carry out glycolysis even after this period of deprivation,  
278 before the addition of exogenous glucose, indicating that a HS diet is leading to a substantial  
279 reservoir of sugar within the epithelium (Fig. 5B). The increased glycolytic rate of crypts from HS-  
280 fed mice was maintained throughout the assay, supporting the idea that dietary sugar directly  
281 activated this metabolic pathway in epithelial cells (Fig. 5B). After the addition of oligomycin, which  
282 blocks the production of ATP from aerobic respiration, neither crypts from HS- nor HF-fed mice  
283 exhibited a compensatory increase in glycolysis, as has been measured in most other cells (Fig.  
284 5B). In concert with the increased SRC of colonic epithelium from HS-fed mice, the lack of a  
285 compensatory increase in glycolysis in colonic crypt cells when respiration is blocked suggests  
286 that glycolysis and aerobic metabolism may be uncoupled in colonic crypts and that these cells  
287 may not have the capacity to rapidly switch their metabolic profile when nutrient availability  
288 changes. In accord, RNAseq analysis of the epithelium revealed a distinctly increased expression  
289 of glycolysis-regulating enzymes, such as *Hk2*, *Hk3*, and *Pfkfb3* in HS-fed epithelium treated with  
290 DSS (Fig. S6 E-G). The intestinal epithelium typically relies on aerobic respiration via fatty acid  
291 oxidation (Fan et al., 2015). Thus, we hypothesize that colonic crypts from HS-fed mice are primed

292 for an increased glycolytic rate, yet are unable to efficiently utilize the glycolytic metabolites for  
293 respiration, as demonstrated by an increased SRC.

294

295 **Coupling glycolysis with aerobic respiration rescues colonoid development when cultured**  
296 **in excess sugar.**

297 Given HS diet increased glycolytic potential of crypts without a requisite increase in aerobic  
298 respiration, we postulated that HS conditions may be impairing the flux of glucose and its  
299 downstream metabolites into the TCA cycle. Utilizing colonoids cultured in high or low glucose  
300 conditions, we compared total metabolite pools. In accord with our glucose stress test of isolated  
301 crypts, we found that HS-cultured colonoids have greater stores of intracellular-glucose (Fig. 5C).  
302 HS-cultured colonoids also had higher levels of pyruvate and aspartate, but significantly reduced  
303 levels of the TCA cycle metabolite,  $\alpha$ -ketoglutarate, suggesting reduced conversion of pyruvate  
304 to acetyl-CoA and a reduced flux of glucose metabolites into mitochondrial respiration (Fig. 5D).  
305 Amino acids such as serine, alanine and glycine were increased under HS-conditions, supporting  
306 the notion that pyruvate entry into the TCA cycle is inhibited under HS conditions (Fig. 5E).  
307 RNAseq analysis demonstrated that the epithelium from HS-fed, DSS-treated mice expressed  
308 greater levels of the Pyruvate Dehydrogenase kinases (PDHKs) *Pdk1* and *Pdk2*, compared to  
309 DSS-treated, HF-fed mice (Fig. S6 E-G). When active, Pdk1 and Pdk2 inactivate pyruvate  
310 dehydrogenase, blocking the flux of glycolytic metabolites into the TCA cycle by inhibiting the  
311 conversion of pyruvate to acetyl-CoA. Therefore, increases in pyruvate PDHKs may explain the  
312 inefficient utilization of glycolytic metabolites. To determine whether these PDHKs are responsible  
313 for impairing epithelial regeneration, we treated isolated ISCs with dichloroacetate (DCA), a PDHK  
314 inhibitor. DCA is a drug used to increase aerobic utilization of glucose by increasing the rate at  
315 which pyruvate is converted to acetyl-CoA and enters the TCA cycle (Madhok, Yeluri, Perry,  
316 Hughes, & Jayne, 2010; Michelakis et al., 2010; Shahrzad, Lacombe, Adamcic, Minhas, &  
317 Coomber, 2010; J. Y. Y. Wong, Huggins, Debidda, Munshi, & De Vivo, 2008). Treatment of

318 developing organoids revealed that DCA significantly increased viability and organoid number  
319 developing from ISCs cultured in inhibitory levels (70mM) of sucrose, fructose and glucose (Fig.  
320 5 F and G). We did not observe similar improvements in organoid development when treating  
321 stem cells with rotenone, an inhibitor of the mitochondrial respiratory chain, and only modest  
322 improvements with 2-deoxyglucose, a glycolysis inhibitor (Fig. 5H). RNAseq analysis of colonoids  
323 treated with excess glucose had a significant reduction in the expression of core ISC genes such  
324 as *Lgr5*, *Axin2* and *Ascl2*, all of which were substantially restored with DCA treatment (Fig. 5 I-J).  
325 Further, GSEA showed enrichment in control-treated colonoids for gene sets associated with E2F  
326 targets and the Intestinal Stem Cell signature, the latter of which was restored with DCA treatment  
327 of glucose-impaired colonoids (Fig. 5 K and L). Therefore, we hypothesize that it is not high  
328 glycolytic rates or reduced mitochondrial activity that is impairing ISC function, but rather a PDHK-  
329 mediated deviation of glucose metabolism away from mitochondria and by forcing *Lgr5*<sup>+</sup> ISCs and  
330 their progeny to utilize glucose aerobically, their proliferative and differentiating capacity was  
331 rescued.

332

### 333 **Discussion:**

334

335 We report that excess dietary sugar leads to lethal colonic damage in mice treated with DSS.  
336 We demonstrated direct sugar-induced impairment of ISC growth into organized colonoids *in*  
337 *vitro*. Further, after 3 days of DSS treatment, HS- fed mice already exhibited an impaired  
338 epithelial proliferative response with reduced Ki67<sup>+</sup> staining and fewer daughter cells from *Lgr5*<sup>+</sup>  
339 intestinal stem cells. Failed proliferation of ISCs and TA cells in colonic crypts from HS-fed mice  
340 was associated with an increase in glycolytic response to glucose deprivation that did not  
341 coincide with a requisite increase in respiration. Accordingly, pyruvate accumulated in colonoids  
342 cultured in HS conditions but TCA cycle intermediates were reduced. By biochemically  
343 recoupling glycolysis to aerobic respiration, we restored stem cell growth and colonoid

344 development under high sugar conditions, suggesting sugar-induced shifts in metabolism can  
345 directly reduce the proliferation of the colonic epithelium.

346

347 In contrast to previous studies using diets high in sugar and low in fiber, or supplementing  
348 standard chow with sugar water, we did not correlate increased susceptibility to significant shifts  
349 in the microbiome (Desai et al., 2016; Khan et al., 2020; Laffin et al., 2019). We cannot rule out  
350 the possibility that these taxa may exacerbate disease once inflammation has begun and  
351 indeed, the HS-diet-associated microbiome did contribute to worse outcomes in gnotobiotic  
352 mice, but altogether our data indicated that intestinal bacteria are unlikely the cause of the  
353 massive and rapid failure of the colonic epithelium seen in DSS-treated HS-fed mice. We also  
354 did not observe a distinct outgrowth in mucophilic bacteria (*Akkermansia spp.*) in our HS-fed  
355 mice (Desai et al., 2016; Khan et al., 2020). We suspect that this is because our HS diet was  
356 low in fiber, but not fiber free and thus we may have been able to avoid the expansion of mucus-  
357 degrading bacteria.

358

359 Sugar is typically absorbed by the duodenum and it is unlikely that our ancestors' diet contained  
360 foods with high enough sugar concentrations to reach the colon (Röder et al., 2014;  
361 Spreadbury, 2012; Yoshikawa et al., 2011). However, soft drinks and other modern, processed  
362 foods contain large concentrations of acellular sugar and it is possible that sugar reaches the  
363 colon when these foods are consumed (Khan et al., 2020). Unlike the small intestine, the  
364 colonic epithelium does not express the bi-directional glucose transporter GLUT2 (Wang et al.,  
365 2020), that transports glucose into the bloodstream and we hypothesize that the colonic  
366 epithelium is a terminal endpoint for sugar, making it more susceptible to increases in dietary  
367 sugar. Indeed, even after 3 hours of glucose deprivation, HS-fed crypts were still able to perform  
368 glycolysis demonstrating glucose storage capacity in these cells. One prediction from this

369 hypothesis is that regeneration of the small intestine would be much less affected by high sugar  
370 concentrations because the small intestinal cells pass sugar to the host.

371  
372 We found that high sugar concentrations prevented the development of colon-derived organoids  
373 from stem cells but was not toxic to established colonoids. This indicates that sugar is likely  
374 directly impairing ISCs function or the earliest progenitor cells, rather than impacting  
375 differentiated epithelium. ISCs have distinct metabolic needs compared to most other cell types.  
376 For example, in the small intestine, Paneth cells have been shown to metabolically tune ISCs,  
377 performing glycolysis to produce lactate before transferring it to ISCs, where it is converted to  
378 pyruvate and used for respiration (Rodríguez-Colman et al., 2017; Sato et al., 2011). That ISCs  
379 require an adjacent cell to carry-out glycolysis supports the hypothesis that this metabolic  
380 pathway may have negative effects on their biology. Further, ISCs with impaired fatty acid  
381 oxidation leads to disrupted self-renewal and ultimately loss of Lgr5<sup>+</sup> stem cells (Chen et al.,  
382 2020) demonstrating the importance of fuel metabolism in ISC function.

383  
384 Based upon our finding of increased glycolytic response to glucose deprivation and increased  
385 SRC in colonic crypts of HS-fed mice, we postulate that 'forced' glycolysis may actually impede  
386 aerobic respiration in ISCs and their adjacent daughter TA cells. One potential mechanism for  
387 this phenotype is regulation of glycolysis and cell cycle via pyruvate dehydrogenase kinases  
388 (PDHKs) in Lgr5<sup>+</sup> cells, which inhibits pyruvate conversion to acetyl-CoA and further catabolism  
389 via the TCA cycle. Interestingly, in hematopoietic stem cells, PDHKs are important in reducing  
390 glycolytic activity and promoting quiescence (Takubo et al., 2013). We hypothesize that PDHKs  
391 have much the same function in intestinal stem cells and, when they are increased by high  
392 sugar concentrations, they prevent regenerative proliferation in the crypt.

393



394 Intestinal regeneration is necessary to maintain barrier integrity, especially in patients exposed  
395 to direct intestinal damage such as flares of IBD or radiation therapy. Here we have shown the  
396 deleterious effects of consuming excess dietary sucrose in a murine model of intestinal damage.  
397 Treatment of active flares of Crohn's Disease and Ulcerative Colitis often involve exclusive  
398 enteral nutrition which can contain high amounts of sugar and emulsifiers (Grover, Muir, &  
399 Lewindon, 2014). Numerous studies, including our own, have now shown the negative impact of  
400 high sugar diet in murine models of colitis, suggesting that we may improve these therapies by  
401 reducing sugar content (11–13). Indeed, both murine studies and clinical trials in pediatric  
402 cohorts have found that diets lower in sugar lead to better outcomes in patients that exhibited  
403 intestinal inflammation (Obih et al., 2016; Yeh et al., 2019). Therefore, in order to better treat  
404 patients exhibiting high levels of intestinal damage, whether it be from infection, auto-  
405 inflammation, or radiation, it is imperative that we better understand how different dietary  
406 components may impact the regenerative capacity of the intestinal epithelium.

## 407 408 **Materials and Methods:**

### 409 410 **Mouse Models and Treatments.**

411 5-week-old wild type *C57BL/6Tac* mice (B6 MPF; Taconic) were used for diet and DSS  
412 treatment unless otherwise noted. *Lgr5<sup>CreGFP-Cre-ERT2</sup>* (008875) were bred with *Rosa<sup>TdTomato</sup>*  
413 (007909) both purchased at Jackson laboratories. Both male and female age-matched mice (5-  
414 8 weeks) were used for all experiments. All experiments were performed in an American  
415 Association for the Accreditation of Laboratory Animal Care-accredited animal facility at the  
416 University of Pittsburgh. Mice were kept in specific pathogen-free conditions and housed in  
417 accordance with the procedures outlined in the Guide for the Care and Use of Laboratory  
418 Animals under an animal study proposal approved by the Institutional Animal Care and Use  
419 Committee of the University of Pittsburgh. The number of mice used in each experiment was  
420 determined given a predicted effect size of 30% in experimentally measured variables (number  
421 of cells, weights and survival) in DSS-induced colitis would show significance and the variance  
422 within groups could be 15%. In order to have a power of 0.8 and a probability error of 0.05 or  
423 less, we used 4 mice per group and 3 repeats for a total of n=12 to reach sample size large  
424 enough to detect differences. We expected a 2-fold difference of expression and metabolite  
425 accumulation in our enteroid model, given our preliminary data. Therefore, we used tissue from  
426 three independent samples for each experiment type to achieve a power of 0.8 and a probability  
427 error of 0.05 or less. Upon arrival from Taconic, mice were placed on two special diets (Envigo,  
428 Madison, WI) with kilocalories consisting of 18% protein (casein and methionine), 12% fat  
429 (soybean oil), and 70% carbohydrates. The High Sugar (HS, TD.160477) diet derives 94% of  
430 carbohydrates from sucrose and High Fiber diet (HF, TD.160476) contains 94% of  
431 carbohydrates from high amylose cornstarch. Standard diet was composed of 26.1% protein,

432 59.6% carbohydrates and 14.3% fat by Kcal (Prolab IsoPro RMH 3000, 5P75). Mice were  
433 provided food *ad libitum* for 2 weeks and then provided dextran sodium sulfate (DSS) at 3% by  
434 weight in their drinking water *ad libitum* for 1 week. Weights were taken twice weekly during the  
435 initial diet change phase and daily once DSS was initiated and for one week after changing DSS  
436 water back to untreated water. Gnotobiotic C57BL/6 female 8-week mice were housed in germ-  
437 free conditions and then gavaged with the microbiome of HS or HF-fed mice, but kept on  
438 standard facility chow in separate isolators. After 3 days of colonization, mice were started on  
439 3% DSS *ad libitum* and weights were taken daily. Water supplemented with SCFA contained  
440 sodium acetate (0.554g/100mL), sodium butyrate (0.441g/mL) and sodium propionate  
441 (0.249g/mL). Tributyrin was added to high sugar food (5% by weight) and glycerol was added to  
442 high sugar and high fiber food (5% by weight) as controls.

443

#### 444 **Histological analysis of colonic tissue**

445 Distal colon samples were fixed in formalin, dehydrated and paraffin embedded. Sections were  
446 stained with hematoxylin and eosin (H&E) stains for morphological analysis and by TUNEL  
447 staining for apoptotic cell detection. Histopathology analysis was blinded and determined  
448 following the scoring criteria: 1) degree of inflammation in lamina propria (score 0-3); 2) loss of  
449 goblet cells (score 0-2); 3) abnormal crypts or epithelial hyperplasia with nuclear changes (score  
450 0-3); 4) presence of crypt abscesses (score 0-3); 5) mucosal erosion and ulceration (score 0-1);  
451 6) submucosal spread to transmural involvement (score 0-3) and 7) number of neutrophils  
452 (score 0-4). Scores for the seven parameters were combined for a total maximum score of 17  
453 (Ostanin et al., 2009). Distal colon samples were also fixed in Carnoy's fixation, dehydrated and  
454 paraffin embedded and sections were stained with Alcian blue and PAS stain for mucus  
455 detection. Quantification of TUNEL was measured using ImageJ software analysis.

456

#### 457 **16s rRNA gene analysis of bacterial abundance in intestine**

458 Fecal samples were collected on the first day mice were started on their diets (Initial), 2 weeks  
459 after starting their diets (Standard or Defined Diets) and during DSS treatment (DSS). DNA was  
460 isolated using the MoBio Power Soil Isolation Kit and PCR amplified at the V4 region of the 16S  
461 rRNA gene (515F-806R) and sequenced at the Argonne National Library on an Illumina MiSeq  
462 instrument. Microbiome informatics were performed using QIIME2 2020.2 (Bolyen et al., 2019).  
463 Raw sequences were quality-filtered and denoised with DADA2 (Callahan et al., 2016).  
464 Amplicon variant sequences (ASVs) were aligned with mafft and used to construct a phylogeny  
465 with fasttree2 (Kato, Misawa, Kuma, & Miyata, 2002; Price, Dehal, & Arkin, 2010). Alpha  
466 diversity metrics (observed OTUs), beta diversity metrics (Bray Curtis dissimilarity) and Principle  
467 Coordinate Analysis (PCoA) were estimated after samples were rarefied to 63,000 (subsampling  
468 without replacement) sequences per samples. Taxonomy was assigned to ASVs using naive  
469 Bayes taxonomy classifier against the Greengenes 18\_8 99% OTUs reference sequences  
470 (McDonald et al., 2012). All plots were made with publicly available R packages.

471

#### 472 **Blood glucose assay**

473 Mice were fed defined diets for 2 weeks then either fasted or allowed to eat overnight and blood  
474 was taken from the retro-orbital sinus after anesthesia with isoflurane. Glucose levels were  
475 measured using a Precision Xtra glucometer.

476

#### 477 **FITC-dextran assay**

478 To evaluate gut permeability, 4kDA FITC-dextran (Sigma-Aldrich) was dissolved in PBS  
479 (100mg/ml) and mice were orally gavaged at 44mg/100g of body weight after fasting for 8  
480 hours. Mice were euthanized and blood was collected immediately via cardiac puncture. Serum  
481 was isolated and diluted with an equal volume of PBS, of which 100µL was added to a 96-well  
482 microplate in duplicate. The plate was read at an excitation of 485nm and an emission

483 wavelength of 528nm to quantify FITC in blood, using a serially dilutes FITC-dextran to  
484 calculation concentration. Mice treated with DSS on standard diet and gavaged with FITC-  
485 dextran were used as a positive control of mice with a damaged intestinal barrier.

486

#### 487 **Gene expression profiling by RNAseq and bioinformatics analyses**

488 Bulk epithelium was isolated from Rag1<sup>-/-</sup> mice by scraping the apical side of the colonic tissue  
489 to release cells and placing in trizol to isolate RNA. Mice were fed defined diets for 2 weeks and  
490 were either untreated (n=3) or treated with 3 days of 3% DSS drinking water (n=4). DSS treated  
491 samples were precipitated overnight in Lithium Chloride to remove DSS that may interfere with  
492 the sequencing process. Lgr5<sup>+</sup> cells were isolated from the colons of Lgr5<sup>eGFP-IRES-Cre-ERT2</sup>  
493 reporter mice fed defined diets for 2 weeks, as described previously with some modifications  
494 (Fan et al., 2015). Briefly, colons were butterflied and vortexed to remove luminal contents then  
495 incubated at 37°C for 30 minutes in EDTA to dissociate the epithelium from the lamina propria.  
496 Vortexing released crypts, which were passed through a 20-gauge needle to dissociate further  
497 into single cell suspension as well as passed over a 20-micron filter to further break up any  
498 remaining clumps of cells. Cells were stained with a Live/Dead discrimination dye and  
499 antibodies against EPCAM and CD45.2 and then resuspended in rock-inhibitor containing  
500 DMEM to prevent differentiation of Lgr5<sup>+</sup> stem cells. Live cells were sorted on the MoFlo Astrios  
501 (Beckman) cell sorter directly into Takara kit lysis buffer (SmartSeq HT). Cultured colonoids  
502 were grown in the conditions listed below and their RNA was extracted via Trizol separation.  
503 DNA libraries were prepared (Nextera XT kit) and RNA-sequencing was performed on Illumina  
504 NextSeq500 by the University of Pittsburgh Health Sciences Sequencing Core. Adapter  
505 sequences were trimmed from raw reads using Trimmomatic with default parameters.  
506 TopHat2.1.1 was used to map trimmed reads onto mouse genome build mm10 and Cufflinks  
507 was used to calculate gene expression values (FPKM; fragments per kilobase exon per million  
508 mapped reads) (Bolger, Lohse, & Usadel, 2014; Trapnell et al., 2012). Enrichment of genesets  
509 were calculated using Gene set enrichment analysis (GSEA) from the Broad Institute  
510 (<http://www.broad.mit.edu/gsea>). Heatmaps were created using Morpheus from the Broad  
511 Institute (<https://software.broadinstitute.org/morpheus>) from FPKM log<sub>2</sub> transformed expression  
512 levels.

513

#### 514 **Tamoxifen (TX) administration**

515 Tamoxifen (TX, Sigma-Aldrich), was orally gavaged at 5mg/mouse/day, on the first day of DSS  
516 treatment. Since TX is poorly soluble in water, the amount needed for a single day was  
517 dissolved in 95% ethoanol with heating to 37°C and then diluted in corn oil (Sigma) such that  
518 100µL had 5mg.

519

#### 520 **Microscopy**

521 Distal colonic tissue was flushed of luminal contents using PBS and then fixed for 1 hour in 2%  
522 PFA, dehydrated in 30% sucrose overnight and flash-frozen in OTC media. Sections were  
523 stained with antibodies specific to EPCAM (BioLegend, clone G8.8, catalog # 118212) and Ki67  
524 (Invitrogen, clone SolA15, ref 14-5698-82) overnight and 5 minutes for the Hoechst nuclear stain  
525 for (Invitrogen, ref H3570). Images were taken on Zeiss LSM 510 and Nikon A1 confocal  
526 microscopes and analyzed using ImageJ software.

527

#### 528 **Flow cytometry**

529 All antibodies used for flow cytometry were purchased from either ThermoFisher, BD  
530 Biosciences, or BioLegend. The antibodies we used for flow cytometry are: CD45.2 (Invitrogen,  
531 clone 104, ref 47-0454-82), EPCAM (BD Biosciences, clone G8.8, catalog # 563478), activated-  
532 Caspase-3 (BD Biosciences, clone C92-605, catalog # 560901), and Ki67 (BioLegend, clone  
533 16A8, catalog # 652403). Dead cells were discriminated in all experiments using LIVE/DEAD

534 fixable dead stain (ThermoFisher, catalog # 501121526). All stains were carried out in media  
535 containing anti-CD16/32 blocking antibody (ThermoFisher, clone 93, catalog # 14-0161-86). All  
536 flow cytometry was acquired on an LSRFortessa FACS analyzer. Cells were isolated from the  
537 colon for flow cytometry using EDTA and DTT dissociation and shaking to release the  
538 epithelium from the lamina propria (Hall et al., 2011). To separate intraepithelial cells, the cell  
539 suspension was spun down in a 30% percoll gradient. Analysis of flow cytometry was carried  
540 out on FlowJo software (TreeStar).

541

#### 542 **Seahorse Metabolic Flux Analysis**

543 Crypts were isolated as described previously (25). Crypts were seeded at 150crypts/50 $\mu$ L on  
544 Cell-Tak-coated Seahorse Bioanalyzer XFe96 culture plates (300,000 or 100,000 cells/well,  
545 respectively) in assay media consisting of minimal, unbuffered DMEM supplemented with 1%  
546 BSA and 25 mM glucose, 2 mM glutamine, and for some experiments, 1 mM sodium pyruvate  
547 and Matrigel. Basal rates were taken for 30 min, and in some experiments, oligomycin (2  $\mu$ M),  
548 carbonyl cyanide p-trifluoromethoxyphenylhydrazone (FCCP) (0.5  $\mu$ M), 2-deoxy-d-glucose (10  
549 mM), and rotenone/antimycin A (0.5  $\mu$ M) were injected to obtain maximal respiratory and control  
550 values. Spare respiratory capacity (SRC) was measured as the difference between the basal  
551 oxygen consumption rate (OCR) and the maximum OCR after FCCP injection. A glucose stress  
552 test was used to determine glycolytic response of crypts, where crypts were placed in glucose  
553 free media for 3 hours prior to adding exogenous glucose and extra cellular acidification rate  
554 (ECAR) values were measured while oligomycin (2  $\mu$ M), 2-deoxy-d-glucose (10 mM), and  
555 rotenone/antimycin A (0.5  $\mu$ M) were injected to wells. Figure panels show a representative trace  
556 of one experiment and combined data for SRC and glycolytic rate (calculated as the difference  
557 between maximal ECAR after glucose injection and basal ECAR after 2-DG injection).

558

#### 559 **Fluorescent glucose tracing**

560 Mice were fasted for 8 hours and then anesthetized using isoflurane and a murine  
561 colonoscope (Storz) was inserted. To remove luminal fecal contents and mucus, the colon was  
562 rinsed using 200 $\mu$ L of PBS. After a period of 30 minutes, mice were woken up to allow any fecal  
563 matter to evacuate and then anesthetized again to introduce 100 $\mu$ L of Cy-5-labelled glucose or  
564 Cy-5 secondary goat anti-rat antibody (0.1mM diluted in PBS, ThermoFisher A10525) into the  
565 colon via a gavage needle enema. Mice were supported inverted for 1 minute after the enema  
566 to ensure the probe remained in the colon and then were taken down 30 minutes after and distal  
567 colon samples were collected, fixed in 2% PFA and dehydrated in 30% sucrose overnight.

568

#### 569 **Mouse crypt-derived organoid generation**

570 Mouse intestinal crypt-derived organoids were generated as described previously (Beyaz et al.,  
571 2016). Briefly, 8-12 weeks old mice were euthanized in a CO<sub>2</sub> chamber. The whole intestine  
572 was extracted and cleaned from fat, connective tissue, blood vessels and flushed with ice-cold  
573 PBS. The intestine was cut into smaller pieces after lateralization and incubated in 7.5 mM  
574 EDTA in ice-cold PBS with mild agitation for 45 minutes at 4 C. Then, the crypts were  
575 mechanically dissociated from tissue via shaking and strained through a 40-micron strainer.  
576 After washing with ice-cold PBS and centrifugation at 300 r.c.f. for 5 minutes in a  
577 microcentrifuge (Thermo Fisher 0540390), isolated crypts were counted and embedded in  
578 Matrigel (Corning 356231 Growth Factor Reduced) in 1:4 ratio at 5-10 crypts per  $\mu$ L and plated  
579 in 24-well plates (25  $\mu$ L dome/ well). The Matrigel was allowed to solidify for 8-15 minutes in a  
580 37C incubator and solidified domes were cultured in Advanced DMEM (Gibco) media  
581 supplemented with recombinant murine Chiron 10  $\mu$ M (Stemgent), Noggin 200 ng ml<sup>-1</sup>  
582 (Peprotech), R-spondin 500 ng ml<sup>-1</sup> (R&D or Sino Biological), N2 1X (Life Technologies), B27  
583 1X (Life Technologies), Y-27632 dihydrochloride monohydrate 20 ng ml<sup>-1</sup> (Sigma-Aldrich), EGF

584 40 ng ml<sup>-1</sup> (R&D), N-acetyl-L-cysteine 1 $\mu$ M (Sigma-Aldrich). 500 $\mu$ L of crypt media was changed  
585 every other day and maintained at 37C in fully humidified chamber containing 5% CO<sub>2</sub>.  
586

### 587 **Mouse organoid propagation**

588 Organoids were propagated by dissociating crypt-derived organoids in TrypLE Express  
589 (Invitrogen) for 3min at 37C. After this time, the TrypLE Express was quenched by adding 1-2x  
590 that amount of Advanced DMEM/F12 (Gibco). The pellet containing the dissociated intestinal  
591 single cells after centrifugation in a microcentrifuge (Thermo Fisher 0540390) at 300 r.c.f. for  
592 5min was resuspended in Matrigel (Corning 356231 Growth Factor Reduced) and embedded  
593 onto a flat bottom 24 well cell culture plate (Corning 3526) by forming 20 $\mu$ L droplets of Matrigel,  
594 creating at least three technical replicates for each condition. The embedded Matrigel droplets  
595 were immediately placed inside a fully humidified incubator containing 5% CO<sub>2</sub>, which was  
596 maintained at 37C for 5min to solidify the Matrigel droplets. Once the Matrigel was solidified,  
597 600 $\mu$ L of supplemented Advanced DMEM/F12 cell medium described above was added to each  
598 well. The media was changed every 2 days for each well and the plate was maintained in a 37C  
599 incubator.  
600

### 601 **Human patient-derived colon organoid generation**

602 Human colon organoids were generated as described previously with minor modifications  
603 (Beyaz et al., 2016). Briefly, normal colon tissue samples were obtained from patients with  
604 informed consent undergoing surgical resection procedures at Northwell Health. Study protocols  
605 were reviewed and approved by the Northwell Health Biospecimen Repository (NHBR-1810).  
606 Tissue samples were first cut into small pieces, about 0.5cm<sup>2</sup> and incubated at 4C in an  
607 antibiotic mixture consisting of 1X PBS +100ug/mL Normocin (Invivogen Cat# ant-nr-1),  
608 50ug/mL Gentamicin (Amresco, Cat# E737), and 1X Pen/Strep (ThermoFisher Cat# 15070063)  
609 for 15 minutes. Next, the pieces were washed with 1X PBS before a 75-minute incubation in a  
610 5mM EDTA solution at 4C on a rocker. After incubating, the tissue samples were washed once  
611 more with 1X PBS. Crypts were then released from the tissue by shaking the pieces in a tube  
612 with ice cold 1X PBS. Crypts in the supernatant were transferred to a new tube and spun down  
613 at 100g for 5 minutes at 4C. These isolated crypts were then embedded in a 70/30 Matrigel  
614 (Corning, Cat# 356231) and culture medium mixture and plated in 40 $\mu$ L droplets on 12 well  
615 plates. The Matrigel was allowed to polymerize at 37C for 15 minutes before adding 1mL of  
616 culture medium to each well, with the culture medium consisting of Advanced DMEM (Life  
617 Technologies 12634028), 1X Glutamax (Life Technologies 35050061), 10mM HEPES (Thermo  
618 Fisher Scientific 15630080), 50% WRN conditioned medium (Homemade), 1X B27 (Life  
619 Technologies 12587010), 1X N2 (Life Technologies 17502048), 10mM Nicotinamide (Sigma  
620 Aldrich N0636), 1mM N-acetyl cysteine (Sigma Aldrich A9165), 100  $\mu$ g ml<sup>-1</sup> Primocin  
621 (Invivogen ant-pm-1), 10 $\mu$ M SB202190 (Sigma Aldrich S7067), 10 $\mu$ M Y-27632 (Tocris 1254),  
622 10nM Gastrin I (Sigma Aldrich G9020), 50 ng ml<sup>-1</sup> EGF (Peprotech AF-100-15), and 500nM  
623 A83-01 (Sigma Aldrich SML0788).  
624

### 625 **Human patient-derived colon organoid propagation**

626 Human colon organoids were dissociated in Cell Recovery Solution (Corning 354253 Growth  
627 Factor Reduced) for up to one hour at 4C. Once the Matrigel was dissolved, the organoids were  
628 spun at 500 r.c.f. for 5 minutes at 4C. The supernatant was removed and the pellet was  
629 resuspended in TrypLE Express (ThermoFisher 12604039). Following a 5 minute incubation at  
630 37C, the digestion was stopped by adding Advanced DMEM. The solution then was centrifuged  
631 at 500 r.c.f. for 5 minutes at 4C. Dissociated cells were seeded in 40 $\mu$ L Matrigel droplets and  
632 culture medium mixture. Culture medium was then added to each well after the domes  
633 polymerized.  
634

635 **Sugar dose response in organoids**

636 Dose response experiments using organoids were carried out using D-(-)-Fructose (Sigma-  
637 Aldrich F0127), D-(+)-Glucose (Sigma-Aldrich G7528), Sucrose (Sigma-Aldrich S0389) at 200,  
638 100, 50, 25, 12.5, 3.1 and 0.8 mM concentrations. Briefly, normal colon organoids were  
639 dissociated to near single cells and plated onto a 24 well plate, with 20 $\mu$ L domes per well.  
640 500 $\mu$ L of culture medium further supplemented with different concentrations of D-(-)-Fructose  
641 (Sigma-Aldrich F0127), D-(+)-Glucose (Sigma-Aldrich G7528), or Sucrose (Sigma-Aldrich  
642 S0389) was added to each well at time of seeding. Media with the supplemented sugars was  
643 refreshed every 2-4 days and growth was followed up to day 12. Alternatively, normal colon  
644 organoids were dissociated to near single cells and plated onto a 24 well plate, with 20 $\mu$ L  
645 domes per well. 500 $\mu$ L of standard culture medium was added and organoids were allowed to  
646 grow to D5. Media was then changed to media with supplemented glucose, fructose, or sucrose  
647 at varying concentrations. Growth was followed for the next 48 hours.  
648

649 **Murine intestinal organoid intracellular metabolite isolation**

650 Unless otherwise stated, the dissociation, centrifugation, embedding of Matrigel droplets, media  
651 addition, and incubator use are the same as indicated previously above for the murine intestinal  
652 organoid culture. For metabolite analysis, organoids were dissociated as described above and  
653 cells were seeded in a 1.5mL 10% Matrigel/90% mouse organoid culture medium slurry for each  
654 condition in separate 24 well plates. The medium for the low glucose condition was  
655 supplemented with 25mM Glucose (Sigma G7021) and the medium for high glucose condition  
656 was supplemented with 100mM Glucose. These plates were spun at 100G for 1min at 4C in a  
657 centrifuge (Eppendorf 022623508) to allow settling of cells to the bottom of the wells. Then, both  
658 plates were placed in a fully humidified 37C incubator.

659 On day 3 of culture, the medium in each well was discarded and replaced with 25mM or 100mM  
660 C-13 isotopic glucose (Cambridge Isotope Labs CLM-1396) supplemented murine organoid  
661 medium. For negative control, empty wells were filled with 1.5mL of the 10% Matrigel/90%  
662 murine organoid medium supplemented with 25mM or 100mM C-13 isotopic glucose. 24 hours  
663 after tracer incubation, organoid medium from each well per condition and the blank wells were  
664 placed into Eppendorf tubes and snap-frozen in liquid Nitrogen. 800 $\mu$ L of 1X PBS was used to  
665 mix and collect the organoids from each experimental well into Eppendorf tubes and these were  
666 spun at 300G for 1min at 4C. After centrifugation, each tube containing the organoid pellet had  
667 its supernatant aspirated without disturbing the pellet. 1mL of metabolite extraction solution  
668 (stored at -80C) consisting of 50% Methanol stock (Sigma 322415), 30% Acetonitrile stock  
669 (Fisher A998N1), 20% distilled water was added to each pellet and mixed thoroughly. Once  
670 mixed, each tube containing the extraction solution was snap frozen in liquid Nitrogen, thawed,  
671 and then snap frozen in liquid Nitrogen again.

672 The thawed tubes were mixed at maximum speed on a thermomixer (Eppendorf 5382000023)  
673 set to 4C for 15min. After mixing, they were incubated overnight at -80C. The next day, these  
674 tubes were centrifuged for 10min at maximum speed at 4C and the supernatant was collected  
675 into Eppendorf tubes while the pellets were kept on ice. This collected supernatant was then  
676 centrifuged for 10min at maximum speed at 4C and its supernatant was decanted into  
677 autosampler vials (Sigma 29659-U) that were then incubated at -80C until metabolite analysis.  
678 300 $\mu$ L of 0.1M NaOH was added to each tube containing an organoid pellet and was mixed  
679 thoroughly followed by max speed incubation for 15min at 4C on a Thermomixer (Eppendorf).  
680 These tubes were then centrifuged at 300G for 5min at 4C and the supernatants were used for  
681 protein quantification using the DC protein quantification assay protocol (Bio-rad 5000112). After  
682 incubation at -80 °C for 1 hour, samples were centrifuged to remove the precipitated proteins  
683 and insoluble debris. The supernatants were collected and stored in autosampler vials at -80°C  
684 until analysis.

685 Samples were randomized to avoid bias due to machine drift, and processed blindly. LC-MS  
686 analysis was performed using a Vanquish Horizon UHPLC system coupled to a Q Exactive HF  
687 mass spectrometer (both Thermo Fisher Scientific). Sample extracts were analyzed as  
688 previously described (Mackay, Zheng, van den Broek, & Gottlieb, 2015). The acquired spectra  
689 were analyzed using XCalibur Qual Browser and XCalibur Quan Browser software (Thermo  
690 Fisher Scientific) by referencing to an internal library of compounds.

691

### 692 **Sugar and inhibitor treatment in murine intestinal organoids**

693 For each chemical's dose response, the following chemicals were added into the medium for  
694 each well depending on the dose used for that well for a total of 600 $\mu$ L cell medium/chemical  
695 mix around each dome: Rotenone (Sigma R8875), 2-Deoxy-D-Glucose (Sigma D8375), and  
696 Sodium Dichloroacetate (Sigma 347795). Formed organoid numbers were quantified and doses  
697 were chosen on the third day in culture.

698 Unless otherwise stated, the dissociation, centrifugation, embedding of Matrigel droplets, media  
699 addition, and incubator use are the same as indicated previously above for the sugar and  
700 inhibitor culture. Glucose (Sigma G7021), Sucrose (Sigma S9378), and Fructose (Sigma F0127)  
701 as well as the previously stated drugs were added into the cell medium (250 $\mu$ L for each well) of  
702 a flat bottom 48 well culture plate (Corning 3526) containing secondary intestinal cells. The  
703 chosen concentrations for each chemical are as follows: 150mM Glucose, 150mM Fructose,  
704 150mM Sucrose, 7.8nM Rotenone, 1mM 2-Deoxy-D-Glucose, and 4mM Sodium  
705 Dichloroacetate. After embedding the Matrigel domes and solidification, cell medium containing  
706 these doses of chemicals was added with three technical replicates per condition including a  
707 control containing only the supplemented Advanced DMEM/F12 stated previously. From time  
708 zero to time 6 hours, the wells that are supposed to have sugars and inhibitors added together  
709 had only the inhibitors added to inhibit the cells and the wells that are supposed to have only  
710 sugars added had the control supplemented media added. After 6 hours, the sugars were  
711 added alone and with inhibitors to those respective wells. The media for this plate was also  
712 changed every two days. After six days in culture, organoid numbers and sizes were quantified  
713 and CellTiter-Glo® (CTG) values were obtained and plotted as a percent of the control  
714 luminescence (Luminescent Cell Viability Assay, G7570).

715

### 716 **Statistical analysis**

717 Statistical tests used are indicated in the figure legends. Lines in scatter plots represent mean  
718 for that group. Group sizes were determined based on the results of preliminary experiments.  
719 Mouse studies were performed in a non-blinded manner. Statistical significance was determined  
720 with the two-tailed unpaired student's t-test when comparing two groups or one-way ANOVA  
721 with multiple comparisons, when comparing multiple groups, except in the event that there were  
722 missing values due to death (e.g. weight loss curves) in which case multiple t-tests were used to  
723 compare against the High Sugar diet, Standard diet, or Control group, as stated in the figure  
724 legends. All statistical analyses were calculated using Prism software (GraphPad). Differences  
725 were considered to be statistically significant when  $P < 0.05$ .

726

### 727 **Data Availability.**

728 All relevant data, associated protocols and materials are present in SI.

729

730 **Author Contributions:** Conceptualization, A.H.P.B., J.J., G.M.D., S.B. and T.W.H.; Formal  
731 Analysis, A.H.P.B., A.S.H.C., A.V.M., N.R., C.W.M., A.O.D., A.C.P. and V.S.C.; Investigation  
732 A.H.P.B., P.C. J.J., L.M., A.V.M., B.Y., O.E. and K.O.; Resources, S.B., G.M.D and T.W.H.;  
733 Original Draft, A.H.P.B. and T.W.H; Writing-Review & Editing, A.H.P.B., S.B., G.M.D. and  
734 T.W.H.; Supervision, T.W.H.

735 **Competing Interest Statement:** The authors declare no competing interests.

## 736 **Acknowledgments**

737  
738 The authors would like to thank M. Meyers from UPMC Hillman Institute of Cancer flow core for  
739 cell sorting, J. Toothaker for assistance in image analysis, Ece Kilic for assistance with the  
740 metabolomics analysis, the staff of the Division of Laboratory Animal Services for the animal  
741 husbandry, the UPMC Children's Hospital of Pittsburgh Histology Core, W. MacDonald and R.  
742 Elbakri at the Univ. of Pittsburgh Health Science Sequencing Core, the Center for Biological  
743 Imaging, the University of Pittsburgh Center for Research Computing, and the members of the  
744 Hand, Beyaz, Delgoffe, Cooper and Poholek labs for helpful discussions. This work was  
745 supported by the RK Mellon Institute for Pediatric Research, the NIH (T32AI089443-10 to  
746 A.H.P.B.), the Damon Runyon Cancer Research Foundation Postdoctoral Fellowship (2360-19  
747 to A.O.D.) and the Kenneth Rainin Foundation (Innovator's Award). This work was performed  
748 with assistance from the CSHL Mass Spectrometry Shared Resource, which is supported by the  
749 Cancer Center Support Grant (5P30CA045508).The authors declare no competing interests.

## 750 **References**

- 751  
752  
753 Ayres, J. S., Trinidad, N. J., & Vance, R. E. (2012). Lethal inflammasome activation by a  
754 multidrug-resistant pathobiont upon antibiotic disruption of the microbiota. *Nature*  
755 *Medicine*, 18(5), 799–806. <https://doi.org/10.1038/nm.2729>  
756 Ayyaz, A., Kumar, S., Sangiorgi, B., Ghoshal, B., Gosio, J., Ouladan, S., ... Gregorieff, A.  
757 (2019). Single-cell transcriptomes of the regenerating intestine reveal a revival stem cell.  
758 *Nature*, 569(7754), 121–125. <https://doi.org/10.1038/s41586-019-1154-y>  
759 Barker, N, van Es, J. H., Jaks, V., Kasper, M., Snippert, H., Toftgård, R., & Clevers, H. (2008).  
760 Very long-term self-renewal of small intestine, colon, and hair follicles from cycling  
761 Lgr5+ve stem cells. *Cold Spring Harbor Symposia on Quantitative Biology*, 73, 351–356.  
762 <https://doi.org/10.1101/sqb.2008.72.003>  
763 Barker, Nick, van Es, J. H., Kuipers, J., Kujala, P., van den Born, M., Cozijnsen, M., ... Clevers,  
764 H. (2007). Identification of stem cells in small intestine and colon by marker gene Lgr5.  
765 *Nature*, 449(7165), 1003–1007. <https://doi.org/10.1038/nature06196>  
766 Beyaz, S., Mana, M. D., Roper, J., Kedrin, D., Saadatpour, A., Hong, S.-J., ... Yilmaz, Ö. H.  
767 (2016). High-fat diet enhances stemness and tumorigenicity of intestinal progenitors.  
768 *Nature*, 531(7592), 53–58. <https://doi.org/10.1038/nature17173>  
769 Bjerknes, M., & Cheng, H. (1999). Clonal analysis of mouse intestinal epithelial progenitors.  
770 *Gastroenterology*, 116(1), 7–14.  
771 Bolger, A. M., Lohse, M., & Usadel, B. (2014). Trimmomatic: a flexible trimmer for Illumina  
772 sequence data. *Bioinformatics*, 30(15), 2114–2120.  
773 <https://doi.org/10.1093/bioinformatics/btu170>  
774 Bolyen, E., Rideout, J. R., Dillon, M. R., Bokulich, N. A., Abnet, C. C., Al-Ghalith, G. A., ...  
775 Caporaso, J. G. (2019). Reproducible, interactive, scalable and extensible microbiome  
776 data science using QIIME 2. *Nature Biotechnology*, 37(8), 852–857.  
777 <https://doi.org/10.1038/s41587-019-0209-9>  
778 Byndloss, M. X., Olsan, E. E., Rivera-Chávez, F., Tiffany, C. R., Cevallos, S. A., Lokken, K. L.,  
779 ... Bäumlér, A. J. (2017). Microbiota-activated PPAR-γ signaling inhibits dysbiotic  
780 Enterobacteriaceae expansion. *Science*, 357(6351), 570–575.  
781 <https://doi.org/10.1126/science.aam9949>  
782 Callahan, B. J., McMurdie, P. J., Rosen, M. J., Han, A. W., Johnson, A. J. A., & Holmes, S. P.  
783 (2016). DADA2: High-resolution sample inference from Illumina amplicon data. *Nature*  
784 *Methods*, 13(7), 581–583. <https://doi.org/10.1038/nmeth.3869>



- 785 Castillo-Azofeifa, D., Fazio, E. N., Nattiv, R., Good, H. J., Wald, T., Pest, M. A., ... Asfaha, S.  
786 (2019). Atoh1+ secretory progenitors possess renewal capacity independent of Lgr5+  
787 cells during colonic regeneration. *The EMBO Journal*, 38(4).  
788 <https://doi.org/10.15252/embj.201899984>
- 789 Chassaing, B., Aitken, J. D., Malleshappa, M., & Vijay-Kumar, M. (2014). Dextran sulfate  
790 sodium (DSS)-induced colitis in mice. *Current Protocols in Immunology / Edited by John*  
791 *E. Coligan ... [et Al.]*, 104, Unit 15.25. <https://doi.org/10.1002/0471142735.im1525s104>
- 792 Chen, L., Vasoya, R. P., Toke, N. H., Parthasarathy, A., Luo, S., Chiles, E., ... Verzi, M. P.  
793 (2020). HNF4 regulates fatty acid oxidation and is required for renewal of intestinal stem  
794 cells in mice. *Gastroenterology*, 158(4), 985–999.e9.  
795 <https://doi.org/10.1053/j.gastro.2019.11.031>
- 796 Cheng, H., & Leblond, C. P. (1974). Origin, differentiation and renewal of the four main epithelial  
797 cell types in the mouse small intestine. V. Unitarian Theory of the origin of the four  
798 epithelial cell types. *The American Journal of Anatomy*, 141(4), 537–561.  
799 <https://doi.org/10.1002/aja.1001410407>
- 800 Desai, M. S., Seekatz, A. M., Koropatkin, N. M., Kamada, N., Hickey, C. A., Wolter, M., ...  
801 Martens, E. C. (2016). A Dietary Fiber-Deprived Gut Microbiota Degrades the Colonic  
802 Mucus Barrier and Enhances Pathogen Susceptibility. *Cell*, 167(5), 1339–1353.e21.  
803 <https://doi.org/10.1016/j.cell.2016.10.043>
- 804 Donohoe, D. R., Garge, N., Zhang, X., Sun, W., O'Connell, T. M., Bunger, M. K., & Bultman, S.  
805 J. (2011). The microbiome and butyrate regulate energy metabolism and autophagy in  
806 the mammalian colon. *Cell Metabolism*, 13(5), 517–526.  
807 <https://doi.org/10.1016/j.cmet.2011.02.018>
- 808 Fan, Y.-Y., Davidson, L. A., Callaway, E. S., Wright, G. A., Safe, S., & Chapkin, R. S. (2015). A  
809 bioassay to measure energy metabolism in mouse colonic crypts, organoids, and sorted  
810 stem cells. *American Journal of Physiology. Gastrointestinal and Liver Physiology*,  
811 309(1), G1-9. <https://doi.org/10.1152/ajpgi.00052.2015>
- 812 Furusawa, Y., Obata, Y., Fukuda, S., Endo, T. A., Nakato, G., Takahashi, D., ... Ohno, H.  
813 (2013). Commensal microbe-derived butyrate induces the differentiation of colonic  
814 regulatory T cells. *Nature*, 504(7480), 446–450. <https://doi.org/10.1038/nature12721>
- 815 Grover, Z., Muir, R., & Lewindon, P. (2014). Exclusive enteral nutrition induces early clinical,  
816 mucosal and transmural remission in paediatric Crohn's disease. *Journal of*  
817 *Gastroenterology*, 49(4), 638–645. <https://doi.org/10.1007/s00535-013-0815-0>
- 818 Grundy, M. M.-L., Edwards, C. H., Mackie, A. R., Gidley, M. J., Butterworth, P. J., & Ellis, P. R.  
819 (2016). Re-evaluation of the mechanisms of dietary fibre and implications for  
820 macronutrient bioaccessibility, digestion and postprandial metabolism. *The British*  
821 *Journal of Nutrition*, 116(5), 816–833. <https://doi.org/10.1017/S0007114516002610>
- 822 Hall, J. A., Cannons, J. L., Grainger, J. R., Dos Santos, L. M., Hand, T. W., Naik, S., ... Belkaid,  
823 Y. (2011). Essential role for retinoic acid in the promotion of CD4(+) T cell effector  
824 responses via retinoic acid receptor alpha. *Immunity*, 34(3), 435–447.  
825 <https://doi.org/10.1016/j.immuni.2011.03.003>
- 826 Harnack, C., Berger, H., Antanaviciute, A., Vidal, R., Sauer, S., Simmons, A., ... Sigal, M.  
827 (2019). R-spondin 3 promotes stem cell recovery and epithelial regeneration in the  
828 colon. *Nature Communications*, 10(1), 4368. [https://doi.org/10.1038/s41467-019-12349-](https://doi.org/10.1038/s41467-019-12349-5)  
829 5
- 830 Hou, J. K., Abraham, B., & El-Serag, H. (2011). Dietary intake and risk of developing  
831 inflammatory bowel disease: a systematic review of the literature. *The American Journal*  
832 *of Gastroenterology*, 106(4), 563–573. <https://doi.org/10.1038/ajg.2011.44>
- 833 Kamada, N., Chen, G. Y., Inohara, N., & Núñez, G. (2013). Control of pathogens and  
834 pathobionts by the gut microbiota. *Nature Immunology*, 14(7), 685–690.  
835 <https://doi.org/10.1038/ni.2608>

- 836 Katoh, K., Misawa, K., Kuma, K., & Miyata, T. (2002). MAFFT: a novel method for rapid multiple  
837 sequence alignment based on fast Fourier transform. *Nucleic Acids Research*, *30*(14),  
838 3059–3066. <https://doi.org/10.1093/nar/gkf436>
- 839 Kearney, J. (2010). Food consumption trends and drivers. *Philosophical Transactions of the*  
840 *Royal Society of London. Series B, Biological Sciences*, *365*(1554), 2793–2807.  
841 <https://doi.org/10.1098/rstb.2010.0149>
- 842 Kelly, C. J., Zheng, L., Campbell, E. L., Saeedi, B., Scholz, C. C., Bayless, A. J., ... Colgan, S.  
843 P. (2015). Crosstalk between Microbiota-Derived Short-Chain Fatty Acids and Intestinal  
844 Epithelial HIF Augments Tissue Barrier Function. *Cell Host & Microbe*, *17*(5), 662–671.  
845 <https://doi.org/10.1016/j.chom.2015.03.005>
- 846 Khan, S., Waliullah, S., Godfrey, V., Khan, M. A. W., Ramachandran, R. A., Cantarel, B. L., ...  
847 Zaki, H. (2020). Dietary simple sugars alter microbial ecology in the gut and promote  
848 colitis in mice. *Science Translational Medicine*, *12*(567).  
849 <https://doi.org/10.1126/scitranslmed.aay6218>
- 850 Laffin, M., Fedorak, R., Zalasky, A., Park, H., Gill, A., Agrawal, A., ... Madsen, K. L. (2019). A  
851 high-sugar diet rapidly enhances susceptibility to colitis via depletion of luminal short-  
852 chain fatty acids in mice. *Scientific Reports*, *9*(1), 12294. [https://doi.org/10.1038/s41598-](https://doi.org/10.1038/s41598-019-48749-2)  
853 [019-48749-2](https://doi.org/10.1038/s41598-019-48749-2)
- 854 Lupp, C., Robertson, M. L., Wickham, M. E., Sekirov, I., Champion, O. L., Gaynor, E. C., &  
855 Finlay, B. B. (2007). Host-mediated inflammation disrupts the intestinal microbiota and  
856 promotes the overgrowth of Enterobacteriaceae. *Cell Host & Microbe*, *2*(2), 119–129.  
857 <https://doi.org/10.1016/j.chom.2007.06.010>
- 858 Mackay, G. M., Zheng, L., van den Broek, N. J. F., & Gottlieb, E. (2015). Analysis of Cell  
859 Metabolism Using LC-MS and Isotope Tracers. *Methods in Enzymology*, *561*, 171–196.  
860 <https://doi.org/10.1016/bs.mie.2015.05.016>
- 861 Madhok, B. M., Yeluri, S., Perry, S. L., Hughes, T. A., & Jayne, D. G. (2010). Dichloroacetate  
862 induces apoptosis and cell-cycle arrest in colorectal cancer cells. *British Journal of*  
863 *Cancer*, *102*(12), 1746–1752. <https://doi.org/10.1038/sj.bjc.6605701>
- 864 McDonald, D., Price, M. N., Goodrich, J., Nawrocki, E. P., DeSantis, T. Z., Probst, A., ...  
865 Hugenholtz, P. (2012). An improved Greengenes taxonomy with explicit ranks for  
866 ecological and evolutionary analyses of bacteria and archaea. *The ISME Journal*, *6*(3),  
867 610–618. <https://doi.org/10.1038/ismej.2011.139>
- 868 Michelakis, E. D., Sutendra, G., Dromparis, P., Webster, L., Haromy, A., Niven, E., ... Petruk, K.  
869 C. (2010). Metabolic modulation of glioblastoma with dichloroacetate. *Science*  
870 *Translational Medicine*, *2*(31), 31ra34. <https://doi.org/10.1126/scitranslmed.3000677>
- 871 Monteiro, C. A., Moubarac, J. C., Cannon, G., Ng, S. W., & Popkin, B. (2013). Ultra-processed  
872 products are becoming dominant in the global food system. *Obesity Reviews*, *14 Suppl*  
873 *2*, 21–28. <https://doi.org/10.1111/obr.12107>
- 874 Muñoz, J., Stange, D. E., Schepers, A. G., van de Wetering, M., Koo, B.-K., Itzkovitz, S., ...  
875 Clevers, H. (2012). The Lgr5 intestinal stem cell signature: robust expression of  
876 proposed quiescent “+4” cell markers. *The EMBO Journal*, *31*(14), 3079–3091.  
877 <https://doi.org/10.1038/emboj.2012.166>
- 878 Nunes, N. S., Kim, S., Sundby, M., Chandran, P., Burks, S. R., Paz, A. H., & Frank, J. A. (2018).  
879 Temporal clinical, proteomic, histological and cellular immune responses of dextran  
880 sulfate sodium-induced acute colitis. *World Journal of Gastroenterology*, *24*(38), 4341–  
881 4355. <https://doi.org/10.3748/wjg.v24.i38.4341>
- 882 Obih, C., Wahbeh, G., Lee, D., Braly, K., Giefer, M., Shaffer, M. L., ... Suskind, D. L. (2016).  
883 Specific carbohydrate diet for pediatric inflammatory bowel disease in clinical practice  
884 within an academic IBD center. *Nutrition*, *32*(4), 418–425.  
885 <https://doi.org/10.1016/j.nut.2015.08.025>
- 886 Ostanin, D. V., Bao, J., Koboziev, I., Gray, L., Robinson-Jackson, S. A., Kosloski-Davidson, M.,

- 887 ... Grisham, M. B. (2009). T cell transfer model of chronic colitis: concepts,  
888 considerations, and tricks of the trade. *American Journal of Physiology. Gastrointestinal*  
889 *and Liver Physiology*, 296(2), G135-46. <https://doi.org/10.1152/ajpgi.90462.2008>
- 890 Palmer, C. S., Ostrowski, M., Balderson, B., Christian, N., & Crowe, S. M. (2015). Glucose  
891 metabolism regulates T cell activation, differentiation, and functions. *Frontiers in*  
892 *Immunology*, 6, 1. <https://doi.org/10.3389/fimmu.2015.00001>
- 893 Pflieger, J., He, M., & Abdellatif, M. (2015). Mitochondrial complex II is a source of the reserve  
894 respiratory capacity that is regulated by metabolic sensors and promotes cell survival.  
895 *Cell Death & Disease*, 6, e1835. <https://doi.org/10.1038/cddis.2015.202>
- 896 Potten, C. S. (1990). A comprehensive study of the radiobiological response of the murine  
897 (BDF1) small intestine. *International Journal of Radiation Biology*, 58(6), 925–973.  
898 <https://doi.org/10.1080/09553009014552281>
- 899 Price, M. N., Dehal, P. S., & Arkin, A. P. (2010). FastTree 2 — approximately maximum-  
900 likelihood trees for large alignments. *Plos One*, 5(3), e9490.  
901 <https://doi.org/10.1371/journal.pone.0009490>
- 902 Racine, A., Carbonnel, F., Chan, S. S. M., Hart, A. R., Bueno-de-Mesquita, H. B., Oldenburg,  
903 B., ... Boutron-Ruault, M.-C. (2016). Dietary Patterns and Risk of Inflammatory Bowel  
904 Disease in Europe: Results from the EPIC Study. *Inflammatory Bowel Diseases*, 22(2),  
905 345–354. <https://doi.org/10.1097/MIB.0000000000000638>
- 906 Röder, P. V., Geillinger, K. E., Zietek, T. S., Thorens, B., Koepsell, H., & Daniel, H. (2014). The  
907 role of SGLT1 and GLUT2 in intestinal glucose transport and sensing. *Plos One*, 9(2),  
908 e89977. <https://doi.org/10.1371/journal.pone.0089977>
- 909 Rodríguez-Colman, M. J., Schewe, M., Meerlo, M., Stigter, E., Gerrits, J., Pras-Raves, M., ...  
910 Burgering, B. M. T. (2017). Interplay between metabolic identities in the intestinal crypt  
911 supports stem cell function. *Nature*, 543(7645), 424–427.  
912 <https://doi.org/10.1038/nature21673>
- 913 Sato, T., van Es, J. H., Snippert, H. J., Stange, D. E., Vries, R. G., van den Born, M., ... Clevers,  
914 H. (2011). Paneth cells constitute the niche for Lgr5 stem cells in intestinal crypts.  
915 *Nature*, 469(7330), 415–418. <https://doi.org/10.1038/nature09637>
- 916 Sclafani, A., Zukerman, S., & Ackroff, K. (2014). Fructose- and glucose-conditioned preferences  
917 in FVB mice: strain differences in post-oral sugar appetite. *American Journal of*  
918 *Physiology. Regulatory, Integrative and Comparative Physiology*, 307(12), R1448-57.  
919 <https://doi.org/10.1152/ajpregu.00312.2014>
- 920 Shahrzad, S., Lacombe, K., Adamcic, U., Minhas, K., & Coomber, B. L. (2010). Sodium  
921 dichloroacetate (DCA) reduces apoptosis in colorectal tumor hypoxia. *Cancer Letters*,  
922 297(1), 75–83. <https://doi.org/10.1016/j.canlet.2010.04.027>
- 923 Spreadbury, I. (2012). Comparison with ancestral diets suggests dense acellular carbohydrates  
924 promote an inflammatory microbiota, and may be the primary dietary cause of leptin  
925 resistance and obesity. *Diabetes, Metabolic Syndrome and Obesity: Targets and*  
926 *Therapy*, 5, 175–189. <https://doi.org/10.2147/DMSO.S33473>
- 927 Takubo, K., Nagamatsu, G., Kobayashi, C. I., Nakamura-Ishizu, A., Kobayashi, H., Ikeda, E., ...  
928 Suda, T. (2013). Regulation of glycolysis by Pdk functions as a metabolic checkpoint for  
929 cell cycle quiescence in hematopoietic stem cells. *Cell Stem Cell*, 12(1), 49–61.  
930 <https://doi.org/10.1016/j.stem.2012.10.011>
- 931 Thaiss, C. A., Levy, M., Grosheva, I., Zheng, D., Soffer, E., Blacher, E., ... Elinav, E. (2018).  
932 Hyperglycemia drives intestinal barrier dysfunction and risk for enteric infection. *Science*,  
933 359(6382), 1376–1383. <https://doi.org/10.1126/science.aar3318>
- 934 Thornton, J. R., Emmett, P. M., & Heaton, K. W. (1979). Diet and Crohn's disease:  
935 characteristics of the pre-illness diet. *British Medical Journal*, 2(6193), 762–764.  
936 <https://doi.org/10.1136/bmj.2.6193.762>
- 937 Trapnell, C., Roberts, A., Goff, L., Pertea, G., Kim, D., Kelley, D. R., ... Pachter, L. (2012).

- 938 Differential gene and transcript expression analysis of RNA-seq experiments with  
939 TopHat and Cufflinks. *Nature Protocols*, 7(3), 562–578.  
940 <https://doi.org/10.1038/nprot.2012.016>
- 941 Wang, Y., Song, W., Wang, J., Wang, T., Xiong, X., Qi, Z., ... Chen, Y.-G. (2020). Single-cell  
942 transcriptome analysis reveals differential nutrient absorption functions in human  
943 intestine. *The Journal of Experimental Medicine*, 217(2).  
944 <https://doi.org/10.1084/jem.20191130>
- 945 Watson, M. J., Vignali, P. D. A., Mullett, S. J., Overacre-Delgoffe, A. E., Peralta, R. M.,  
946 Grebinoski, S., ... Delgoffe, G. M. (2021). Metabolic support of tumour-infiltrating  
947 regulatory T cells by lactic acid. *Nature*, 591(7851), 645–651.  
948 <https://doi.org/10.1038/s41586-020-03045-2>
- 949 Winter, S. E., Winter, M. G., Xavier, M. N., Thiennimitr, P., Poon, V., Keestra, A. M., ... Bäumlner,  
950 A. J. (2013). Host-derived nitrate boosts growth of *E. coli* in the inflamed gut. *Science*,  
951 339(6120), 708–711. <https://doi.org/10.1126/science.1232467>
- 952 Wong, J. M. W., de Souza, R., Kendall, C. W. C., Emam, A., & Jenkins, D. J. A. (2006). Colonic  
953 health: fermentation and short chain fatty acids. *Journal of Clinical Gastroenterology*,  
954 40(3), 235–243. <https://doi.org/10.1097/00004836-200603000-00015>
- 955 Wong, J. Y. Y., Huggins, G. S., Debidda, M., Munshi, N. C., & De Vivo, I. (2008).  
956 Dichloroacetate induces apoptosis in endometrial cancer cells. *Gynecologic Oncology*,  
957 109(3), 394–402. <https://doi.org/10.1016/j.ygyno.2008.01.038>
- 958 Yeh, A., Connors, E. M., Ramos-Jimenez, R. G., Firek, B., Novak, E. A., Rogers, M. B., ...  
959 Morowitz, M. J. (2019). Plant-based Enteral Nutrition Modifies the Gut Microbiota and  
960 Improves Outcomes in Murine Models of Colitis. *Cellular and Molecular*  
961 *Gastroenterology and Hepatology*, 7(4), 872–874.e6.  
962 <https://doi.org/10.1016/j.jcmgh.2019.01.007>
- 963 Yilmaz, Ö. H., Katajisto, P., Lamming, D. W., Gültekin, Y., Bauer-Rowe, K. E., Sengupta, S., ...  
964 Sabatini, D. M. (2012). mTORC1 in the Paneth cell niche couples intestinal stem-cell  
965 function to calorie intake. *Nature*, 486(7404), 490–495.  
966 <https://doi.org/10.1038/nature11163>
- 967 Yoshikawa, T., Inoue, R., Matsumoto, M., Yajima, T., Ushida, K., & Iwanaga, T. (2011).  
968 Comparative expression of hexose transporters (SGLT1, GLUT1, GLUT2 and GLUT5)  
969 throughout the mouse gastrointestinal tract. *Histochemistry and Cell Biology*, 135(2),  
970 183–194. <https://doi.org/10.1007/s00418-011-0779-1>  
971

972 **Figures and Tables**  
973

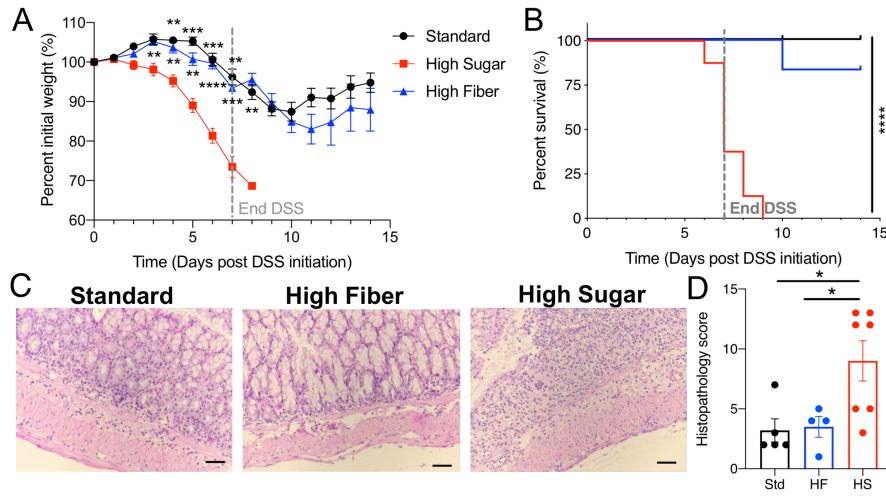

974  
975

976 **Fig.1.** Excess dietary sucrose leads to lethal DSS-induced colonic damage.  
977 (A-B) 5-wk old female Taconic C57BL/6 mice were fed standard (Std), high fiber (HF), or high sugar diet  
978 (HS) for 2 weeks then treated with 3% DSS drinking water for 1 week to induce colonic inflammation.  
979 (A) Percent initial weight and (B) survival during and post DSS treatment. Data are representative of two  
980 independent experiments (n=4-5). Data points represent mean +/- SEM. Multiple t-tests performed  
981 against HS per day where \*\**P*<0.01, \*\*\**P*<0.001, \*\*\*\**P*<0.00001.  
982 (C) Representative Hematoxylin and Eosin staining of colonic sections taken on day 6 of DSS treatment.  
983 Images were taken at 20X magnification (scale bar: 50µm).  
984 (D) Histopathology score of blinded H&E sections, where scores of 1-5 are mild colitis, 6-10 are moderate  
985 and 11-17 are severe, data are representative of 3 experiments (n=2-3). Data points represent mean +/-  
986 SEM. One-way ANOVA used to determine significance in (D) where \**P*<0.05.

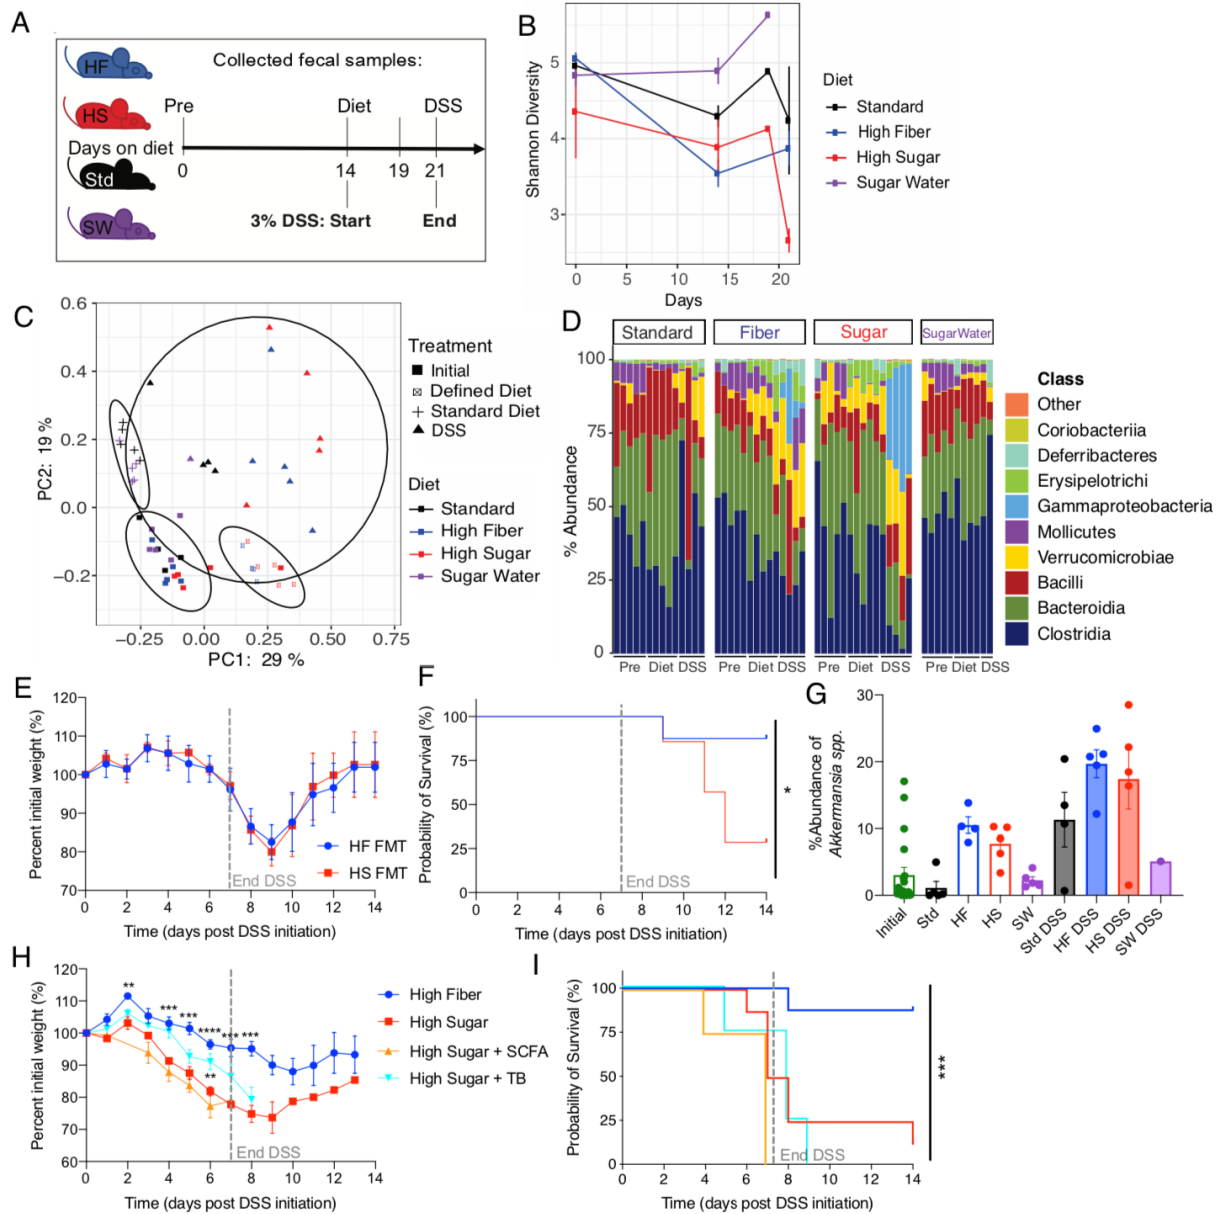

987  
988  
989  
990  
991  
992  
993  
994  
995  
996  
997  
998  
999  
1000  
1001  
1002  
1003

**Fig. 2.** High sugar diet-associated shifts in the microbiome are not sufficient to induce the rapid lethal colitis phenotype of HS-fed, DSS-treated mice.

(A-D, G) 5-wk old female Taconic C57BL/6 mice were fed HS or HF diet for 2 weeks then treated with 3% DSS drinking water, fecal samples were collected for 16S sequencing throughout. (A) Schematic of diet and DSS treatment and days fecal samples were collected for 16S rRNA analysis. “Pre” refers to sample collection on day mice arrived at our facility, “Diet” refers to 14 days of the respective diet (HF=high fiber, HS= high sugar, Std=standard facility chow, SW=Std with 10% sucrose in water) and “DSS” refers to samples collected during DSS treatment. (B) Shannon Diversity of microbial community over time, data points represent mean +/- SD. (C) Ordination plot based on the Principle Coordinate Analysis (PCoA) (Bray Curtis) demonstrate taxonomic variations of microbial communities across mice of different diet treatments where “Defined Diets” include HF and HS, and “Standard Diet” refers to Std and SW. (D) Relative abundances of top 10 most abundant bacterial classes. (G) Relative abundance of *Akkermansia* spp. as determined by 16S rRNA gene sequencing. (E-F) Mice were fed HF, HS, or HS diet with short chain fatty acid (SCFA) supplementation in the water or tributyrin (TB) supplemented in the diet for 1 week then treated with 3% DSS drinking water (dotted line)

1004 for 1 week to induce colonic damage. (E) Percent initial weight and (F) survival curve over DSS treatment  
1005 duration are shown.  
1006 (H-I) Germ-free female C57BL/6 mice were gavaged with fecal microbiome from HS or HF-fed SPF  
1007 C57BL/6 mice, then treated with 3% DSS while fed Std. diet. (H) Representative weight loss curve and (I)  
1008 survival are shown.  
1009 Data are representative of two independent experiments (n=4). Data points represent mean +/- SEM.  
1010 Multiple t-tests performed against HS per day where \* $P < 0.05$ , \*\* $P < 0.01$ , \*\*\* $P < 0.001$ , \*\*\*\* $P < 0.0001$ .  
1011  
1012  
1013  
1014  
1015  
1016  
1017  
1018  
1019  
1020  
1021  
1022  
1023  
1024  
1025  
1026  
1027  
1028  
1029  
1030

1031

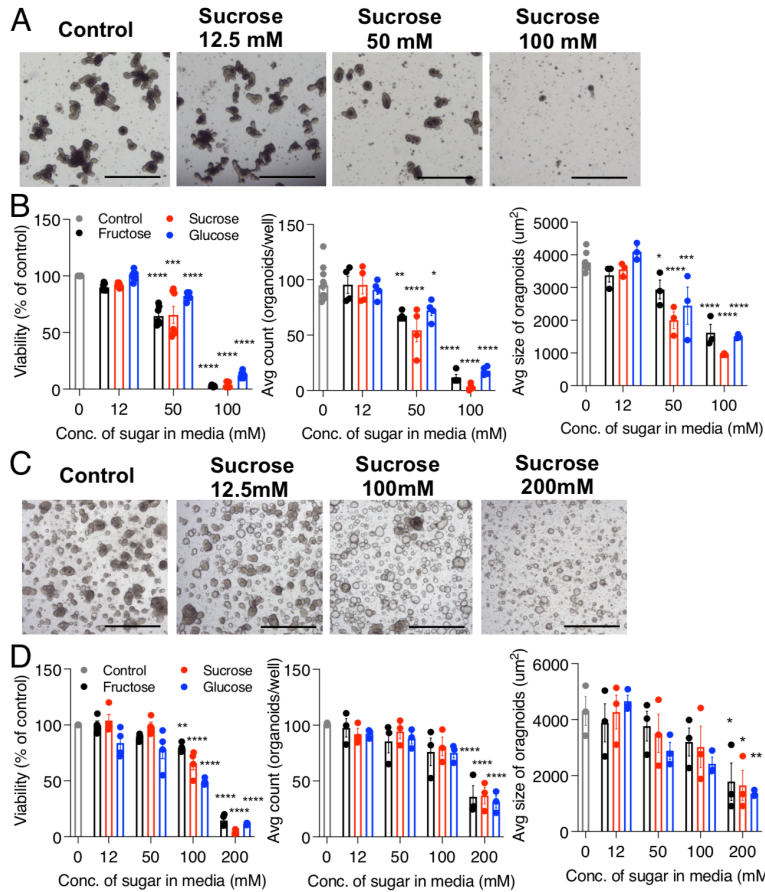

1032  
1033  
1034  
1035  
1036  
1037  
1038  
1039  
1040  
1041  
1042  
1043  
1044  
1045

**Fig. 3.** Excess sugar directly impairs *in vitro* colonoid formation by Lgr5<sup>+</sup> intestinal stem cells.

(A) Murine colonic crypts were cultured in increasing concentrations of sucrose, glucose or fructose under conditions that promote colonoid developed. Shown are representative images of colonoids 5 days after seeding. Images were taken at 4X magnification (scale bar= 200µm).

(B) Viability (percent CTG luminescence of control), number and size of colonoids after 5 days in culture.

(C) Patient colon samples were grown in culture conditions that promote colonoid growth and then dispersed to single cells and regrown with increasing concentration of sugar in the media for 12 days.

(D) Average viability (percent CTG luminescence of control), number and size of colonoids after 12 days in culture are shown. Data are representative of 2 experiments (n=3) and data points are mean +/- SEM.

Stats represent one-way ANOVA with multiple comparisons to Control, where \* $P < 0.05$ , \*\* $P < 0.01$ , \*\*\* $P < 0.001$ , \*\*\*\* $P < 0.0001$ .



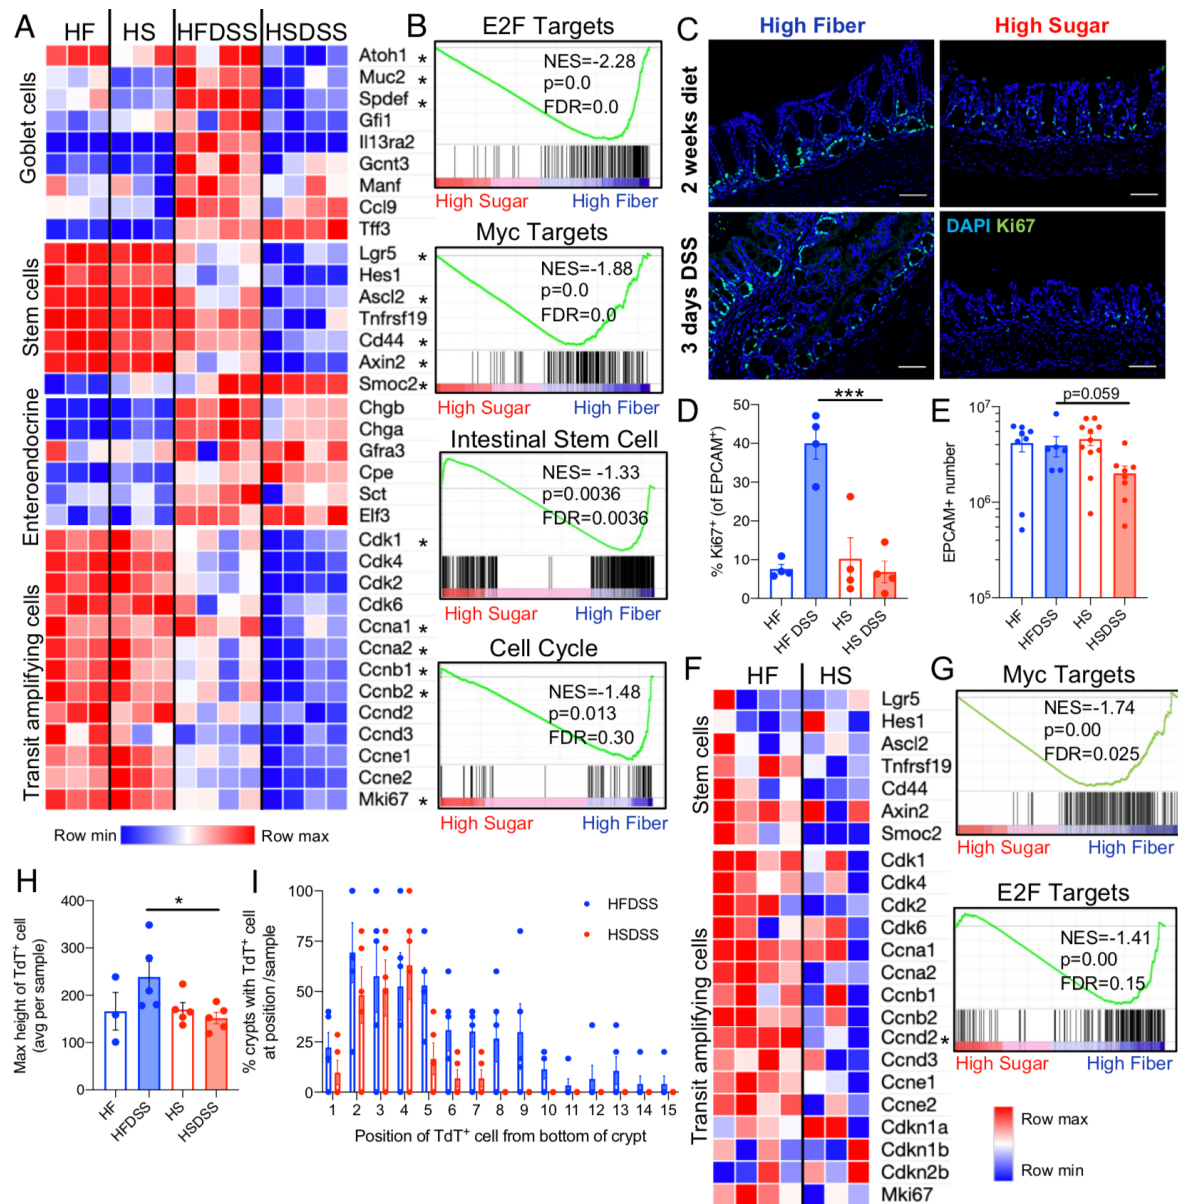

**Fig. 4.** High sugar diet impairs the proliferation of intestinal stem cells.

(A-B) Colonic epithelium was isolated from HS or HF-fed *Rag1*<sup>-/-</sup> female mice with or without 3 days of 3% DSS treatment and analyzed by RNAseq (n=3-4).

(A) Expression level of epithelial subset gene signatures from bulk colonic epithelial RNAseq, where red and blue represent high or low expression level, respectively, normalized across rows and \* represents genes that are significantly differentially expressed in control versus glucose treated colonoids (FC>1.5, P<0.05, FDR<0.3). (B) Gene set enrichment analysis (GSEA) of colonic epithelium RNAseq data showing enrichment of genes in HF DSS treated or HS DSS treated mice for gene sets as indicated.

(C) Representative images of colonic sections stained for Ki67 (green) from mice fed HS or HF diet for two weeks and treated for 3 days with 3% DSS. Images were taken at 20X magnification (scale bars=50µm).

(D) Mice were fed HS or HF diet and treated 3 days with 3% DSS, colonic epithelium was isolated and stained with Ki67 for flow cytometric analysis. Data points represent percent of EPCAM<sup>+</sup> cells that are Ki67<sup>+</sup> per colonic sample, error bars are SEM, representative of 2 experiments (n=4). One-way ANOVA test was used to determine significance where \*\*\*P<0.001.

(E) Number of EPCAM<sup>+</sup> cells in colon after 4 days of 3% DSS treatment. Data are representative of 2

1046  
1047  
1048  
1049  
1050  
1051  
1052  
1053  
1054  
1055  
1056  
1057  
1058  
1059  
1060  
1061  
1062  
1063

1064 experiments (n=3-5) and data points represent mean +/- SEM. Student's t-test used to determine  
1065 significance.  
1066 (F-G) *Lgr5*<sup>+</sup> intestinal stem cells (ISC) were isolated from *Lgr5*<sup>eGFP-Cre-ERT2</sup> female mice fed HS or HF diet  
1067 for 2 weeks and analyzed by RNAseq (n=3-4).  
1068 (F) Transcript expression level of epithelial subset gene signatures as determined by *Lgr5*<sup>+</sup> ISC RNAseq,  
1069 where red and blue represent high or low expression level normalized across rows, respectively rows and  
1070 \* represents genes that are significantly differentially expressed in control versus glucose treated  
1071 colonoids (FC>1.5, *P*<0.05, FDR<0.3). (G) GSEA of *Lgr5*<sup>+</sup> ISC RNAseq data showing enrichment of  
1072 genes in HF-fed or HS-fed mice for gene sets as indicated.  
1073 (H-I) *Lgr5*<sup>eGFP-Cre-ERT2</sup> *Rosa*<sup>LSL-TdTomato</sup> mice were fed HS or HF diet for 2 weeks, injected with Tamoxifen to  
1074 induce Tomato expression (H) the percent of GFP<sup>+</sup> crypts containing Tomato<sup>+</sup> progeny at the specified  
1075 position along crypt and (I) height of most distant Tomato<sup>+</sup> progeny from bottom of crypt (averaged per  
1076 GFP<sup>+</sup> crypt). Data are representative of two independent experiments (n=2-3) and data points represent  
1077 mean +/- SEM. One-way ANOVA used to determine significance where \**P*<0.05.  
1078  
1079  
1080  
1081  
1082  
1083  
1084  
1085  
1086  
1087  
1088  
1089  
1090  
1091  
1092  
1093  
1094  
1095  
1096  
1097  
1098  
1099  
1100  
1101  
1102  
1103  
1104  
1105  
1106  
1107  
1108  
1109  
1110  
1111

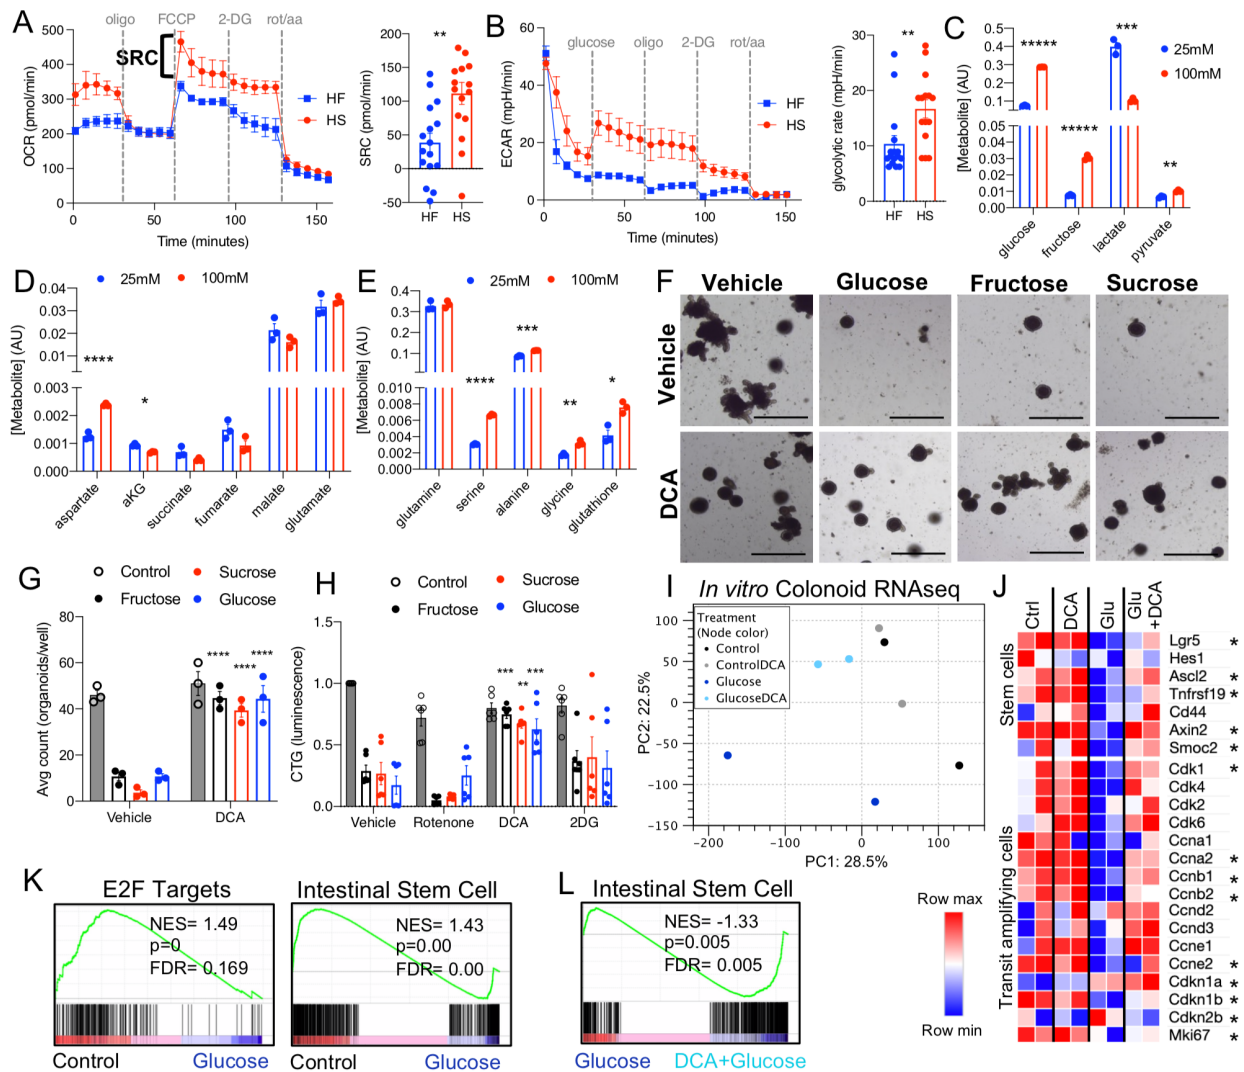

1112  
1113  
1114  
1115  
1116  
1117  
1118  
1119  
1120  
1121  
1122  
1123  
1124  
1125  
1126  
1127  
1128  
1129  
1130  
1131  
1132  
1133

**Fig. 5.** High sugar diet modulates the metabolic capacity of colonic crypts.

(A-B) Colonic crypts were isolated from mice fed HS or HF diet for 2 weeks and plated on Matrigel coated Seahorse XF analyzer plate. (A) Representative oxygen consumption rate (OCR) trace and tabulated spare respiratory capacity (SRC: difference between basal and maximal oxidative rates, achieved after FCCCP injection). (B) Representative extracellular acidification rate (ECAR) trace was measured after 3 hours of glucose deprivation. Glycolytic rate was measured by subtracting the basal rate after 2-DG injection from the maximum response post glucose injection.

(A-B) For Seahorse traces, data are representative of four experiments (n=4) and data points represent mean +/- SEM and tabulated bar charts represent mean +/- SEM with each point representing one mouse. The metabolic inhibitors used were oligomycin (oligo), carbonyl cyanide p-trifluoromethoxyphenylhydrazone (FCCCP), 2-deoxyglucose (2-DG) and rotenone with antimycin (rot/a.a). (C-E) Isolated colonic crypts were cultured in 25mM or 100mM of glucose for 5 days and levels of metabolites were measured via liquid chromatography-mass spectrometry. Data points represent mean +/- SEM and representative of 1 experiment (n=3). Stats represent student's t-test with Benjamini-Hochberg procedure, where \* $P < 0.05$ , \*\* $P < 0.01$ , \*\*\* $P < 0.001$ , \*\*\*\* $P < 0.0001$ .

(F-L) Murine colonoids were cultured in 70mM of sucrose, fructose, glucose, or no-sugar-added control, with or without DCA (dichloroacetate). (F) Representative images of murine colonoids after 5 days of culture in sugar and metabolic inhibitors. Images taken at 4X magnification (scale bars= 200 $\mu$ m). (G) Number of colonoids developed per well with DCA treatment and PBS vehicle control. (H) Viability of colonoids cultured with rotenone, DCA and 2-DG is shown. (I-L) Colonoids were isolated in Trizol and

1134 analyzed via RNAseq. (I) PCA plot showing variance across groups with percentages on axes  
1135 representing percent variance explained by each principle component. (J) Transcript expression level of  
1136 epithelial subset gene signatures as determined colonoid RNAseq, where red and blue represent high or  
1137 low expression level, respectively, normalized across rows. (K) GSEA of colonoid RNAseq data showing  
1138 enrichment of genes in Control-treated compared to Glucose treated colonoids and (L) Glucose-treated  
1139 compared to Glucose/DCA-treated for gene sets indicated.  
1140 Data points represent mean +/- SEM and representative of 2 experiments (n=3) and \* represents genes  
1141 that are significantly differentially expressed in control- versus glucose-treated colonoids (FC>1.5,  
1142  $P<0.05$ , FDR<0.3). Stats represent one-way ANOVA with multiple comparisons to Vehicle, where  
1143 \* $P<0.05$ , \*\* $P<0.01$ , \*\*\* $P<0.001$ , \*\*\*\* $P<0.0001$ .

1144  
1145  
1146  
1147  
1148  
1149  
1150  
1151  
1152  
1153  
1154  
1155  
1156  
1157  
1158  
1159  
1160  
1161  
1162  
1163  
1164  
1165  
1166  
1167  
1168  
1169  
1170  
1171  
1172  
1173  
1174  
1175  
1176  
1177  
1178  
1179  
1180  
1181  
1182  
1183  
1184  
1185  
1186  
1187  
1188  
1189

1190 **Supplemental Figures and Legends**

1191

1192 **Table S1.** Dietary composition of standard and defined diets.

1193 High fiber and high sugar diets were designed to have the same macronutrient composition (percent  
1194 calories coming from protein, carbohydrates and fat are kept constant) with identical ingredients. Units  
1195 indicate gram of ingredient per kilogram of food.

1196 \* Indicates different ingredients were used in Standard diet (Prolab IsoPro RMH 3000, 5P75).

1197

| <b>Ingredient</b>          | <b>Standard</b> | <b>High Fiber</b> | <b>High Sugar</b> |
|----------------------------|-----------------|-------------------|-------------------|
| <b>Protein</b>             | 26.1% kcal      | 17.8% kcal        | 17.8% kcal        |
| Casein                     | *               | 155.5 g/Kg        | 200.0 g/Kg        |
| Methionine                 | 5.8g/Kg         | 3.0 g/Kg          | 3.0 g/Kg          |
| <b>Carbohydrate</b>        | 59.6% kcal      | 70.5% kcal        | 70.5% kcal        |
| Sucrose                    | 14.1g/Kg        | 22.0 g/Kg         | 663.5 g/Kg        |
| High-amylose corn starch   | 313g/Kg         | 699.0 g/Kg        | 2.0 g/Kg          |
| Maltodextrin               | 0g/Kg           | 20.0 g/Kg         | 20.0 g/Kg         |
| Cellulose                  | 208g/Kg         | 9.89 g/Kg         | 9.89 g/Kg         |
| <b>Fat</b>                 | 14.3%           | 11.7% kcal        | 11.7% kcal        |
| Soybean                    | *               | 39.0 g/Kg         | 50.0 g/Kg         |
| Vitamin Mix                | *               | 10.0 g/Kg         | 10.0 g/Kg         |
| Choline Bitartrate         | *               | 2.5 g/Kg          | 2.5 g/Kg          |
| TBHQ, antioxidant          | *               | 0.01 g/Kg         | 0.01 g/Kg         |
| Mineral Mix                | *               | 35.0 g/Kg         | 35.0 g/Kg         |
| Calcium phosphate, dibasic | *               | 4.0 g/Kg          | 4.0 g/Kg          |

1198

1199

1200

1201

1202

1203

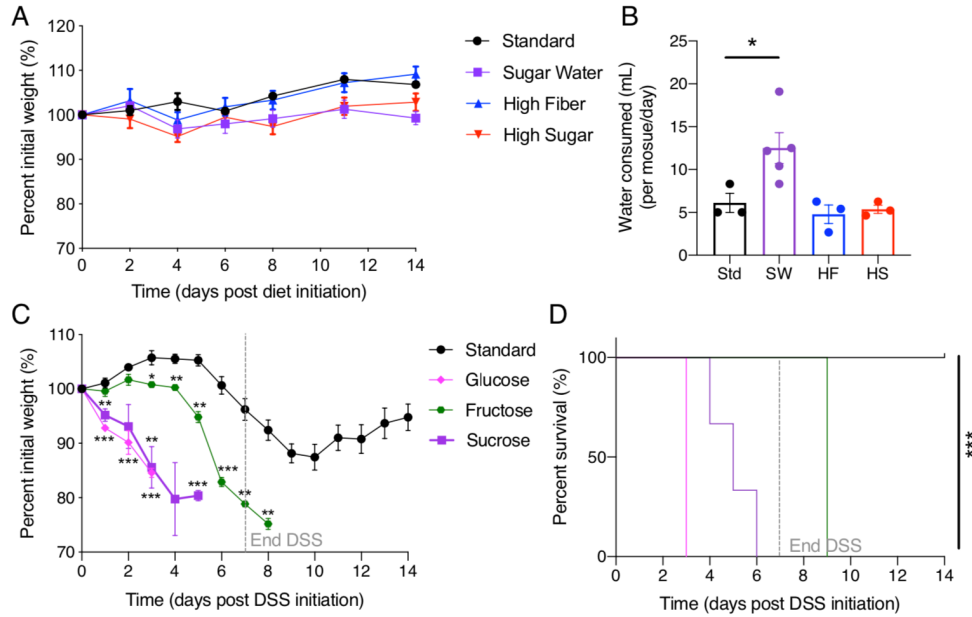

**Fig. S1.** Sugar supplemented water leads to worse DSS-colitis.

(A-B) Mice were fed high sugar (HS), high fiber (HF), standard (Std) or standard diet with 10% sucrose-supplemented water (SW) for 2 weeks.

(A) Weight change and (B) volume of water consumed on respective diets were measured. Data points represent mean +/- SEM and are representative of 2 experiments (n=3-4). One-way ANOVA used to determine significance in (B) where \* $P < 0.05$ .

(C-D) Mice were fed standard diet and water containing 10% sucrose, glucose or fructose and then treated with 3% DSS in drinking water (dotted line) for one week. (C) Percent initial weight and (D) survival are shown. Data are representative of one experiment (n=3). Data points represent mean +/- SEM. Multiple t-tests performed against Standard per day where \* $P < 0.05$ , \*\* $P < 0.01$ , \*\*\* $P < 0.001$ .

1204  
1205  
1206  
1207  
1208  
1209  
1210  
1211  
1212  
1213  
1214  
1215  
1216  
1217  
1218  
1219  
1220  
1221  
1222  
1223  
1224  
1225  
1226  
1227  
1228  
1229  
1230  
1231  
1232  
1233  
1234  
1235  
1236  
1237

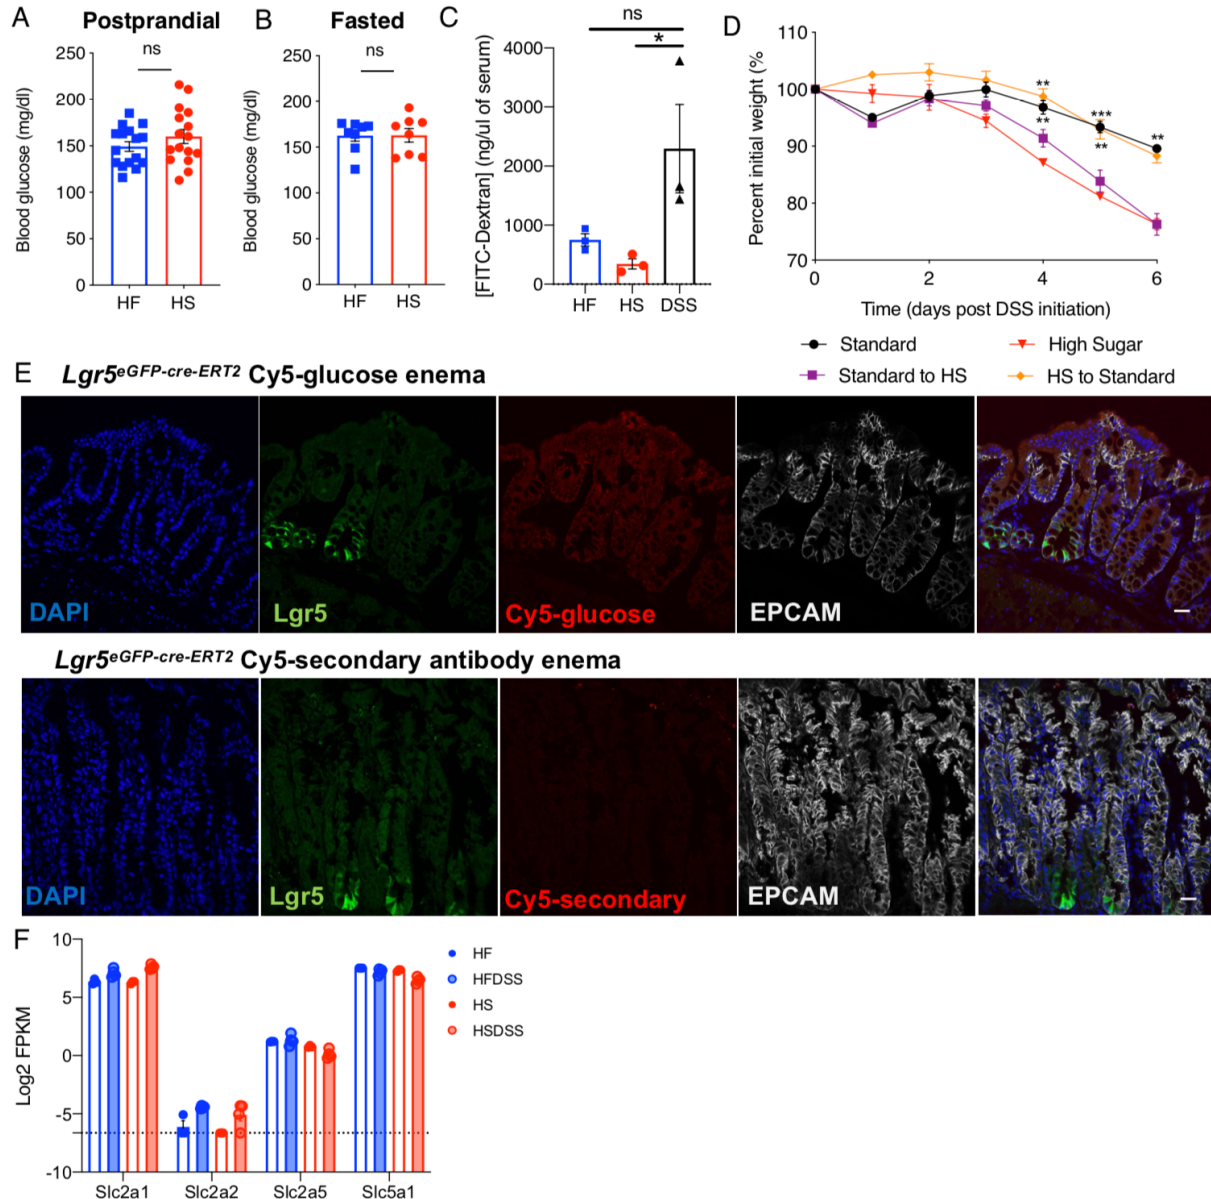

1238  
1239  
1240  
1241  
1242  
1243  
1244  
1245  
1246  
1247  
1248  
1249  
1250  
1251  
1252  
1253  
1254  
1255

**Fig. S2.** Short-term HS diet does not increase blood sugar or intestinal permeability and luminal sugar must be present during damage.

(A-B) Blood glucose concentrations of HS or HF-fed mice, (A) post-prandial (B) and fasted. Data are representative of two to three independent experiments (n=3-4). Each data point represents individual mouse, error bars represents SEM.

(C) FITC-dextran recovered from serum of HS or HF-fed mice. Data are representative of two independent experiments (n=3) data points represent individual mouse, error bars represent SEM. One-way ANOVA used to determine significance where \* $P < 0.05$ .

(D) Mice were fed 2 weeks of standard diet and switched to HS diet on the first day of DSS treatment (purple) or fed 2 weeks of HS diet then switched to standard on the first day of DSS treatment (orange). Percent initial weight is shown. Data are representative of 2 experiments (n=3-4) and data points represent mean  $\pm$  SEM. Multiple t-tests performed against HS per day where \* $P < 0.05$ , \*\* $P < 0.01$ , \*\*\* $P < 0.001$ .

(E) Representative images of colonic sections from fasted  $Lgr5^{GFP-cre-ERT2}$  given a Cy5-glucose enema for 30 minutes prior to sacrifice. Individual and merged channels are shown. Image below is from colonic section of mouse given anti-rat Cy-5 secondary enema as a staining control. Images were taken at 40X magnification, scale bar represents 20 $\mu$ m.

1256 (F) Glucose transporter expression level in HS or HF-fed mice with or without 3 days of 3% DSS treatment  
1257 from RNAseq of colonic epithelium (n=3-4). Data represent individual mouse and error bars represent SEM.  
1258 Dotted line represents no transcript.  
1259  
1260  
1261  
1262  
1263  
1264  
1265  
1266  
1267  
1268  
1269  
1270  
1271  
1272  
1273  
1274  
1275  
1276  
1277  
1278



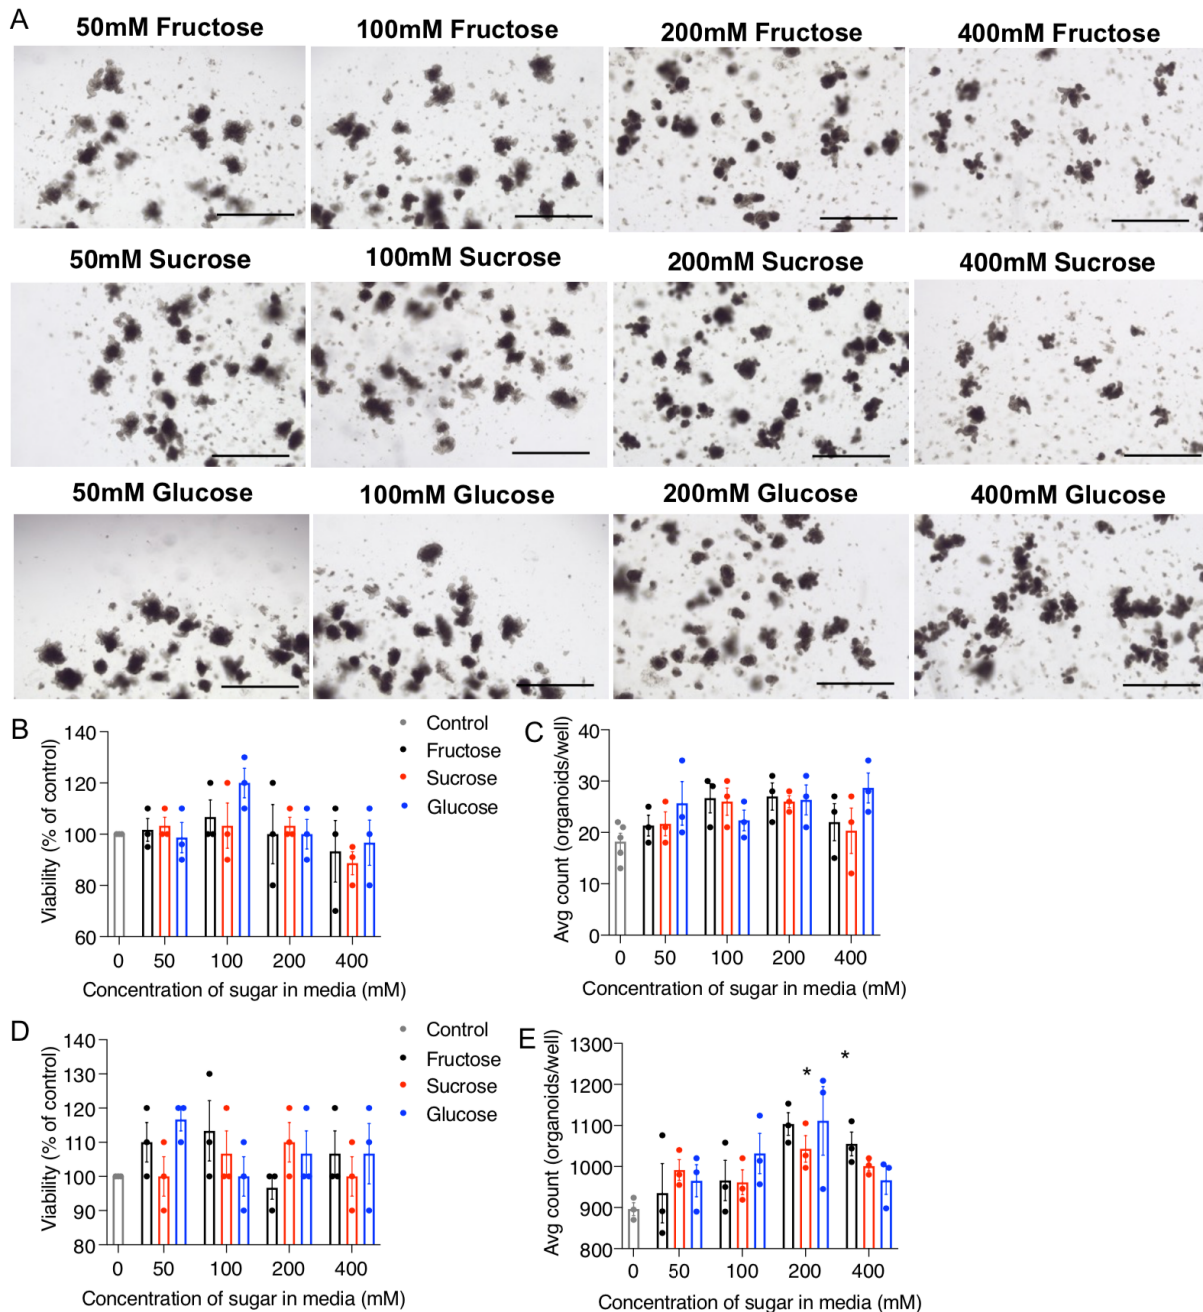

1279  
 1280  
 1281  
 1282  
 1283  
 1284  
 1285  
 1286  
 1287  
 1288  
 1289  
 1290

**Fig. S3.** Excess sugar is not toxic to fully developed colonoids.

(A-C) Colonic crypts were isolated from mice and cultured for 5 days into fully developed 3-D colonoids, which were then exposed to increased concentrations of sucrose for 2 days. (A) Representative images, (B) viability (percent CTG luminescence of control) and (C) number of organoids per well are shown. Images were taken at 4X magnification (scale bars= 200µm). (D-E) After developing into mature human colonoids for 5 days, excess sugar was added for 2 days. (D) Average viability (percent CTG luminescence of control) and (E) number of human colonoids are shown. (B-E) Data are representative of two experiments (n=3) and data points are mean +/- SEM. Stats represent one-way ANOVA with multiple comparisons to Control, where  $*P < 0.05$ .

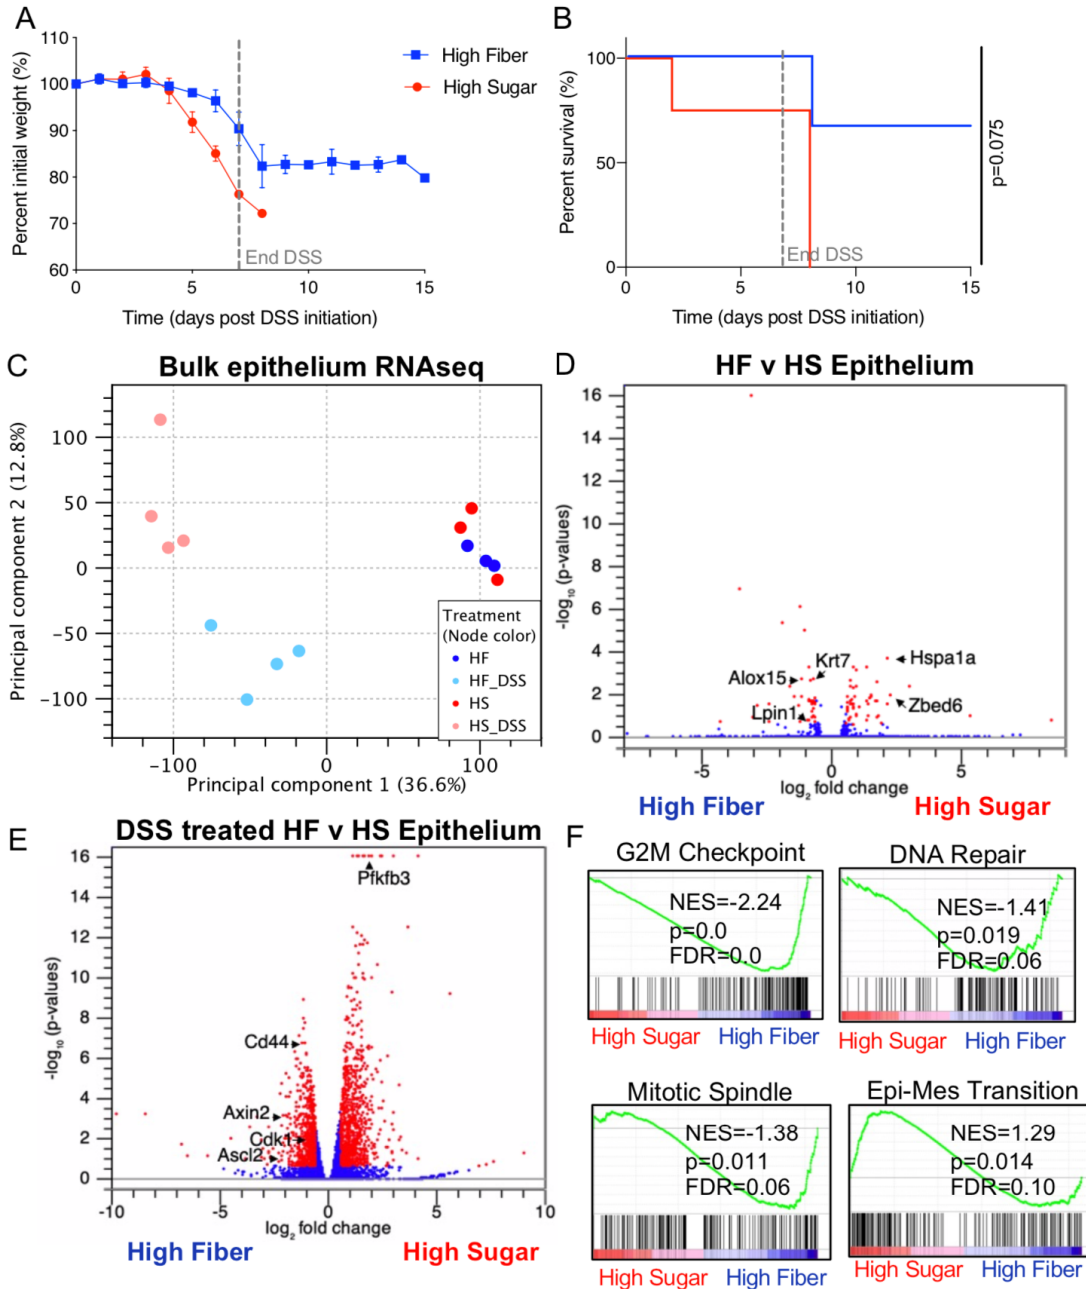

1291  
1292  
1293  
1294  
1295  
1296  
1297  
1298  
1299  
1300  
1301  
1302  
1303  
1304  
1305

**Fig. S4.** High sugar diet changes the transcriptome of the colonic epithelium.

(A-B) *Rag1*<sup>-/-</sup> mice were fed HF or HS diet for 2 weeks then exposed to 3% DSS drinking water for 7 days.

(A) Percent initial weight and (B) survival shown (n=3-4, mean $\pm$  SEM).

(C-F) Bulk colonic epithelium was isolated from *Rag1*<sup>-/-</sup> female mice fed HS or HF diet for 2 weeks with or without 3 days of 3% DSS treatment and transcriptome was sequenced (n=3-4). (C) PCA plot showing variance, (D) volcano plot for genes comparing non-DSS treated samples and (E) volcano plot for genes comparing DSS-treated samples are shown. (F) Gene set enrichment analysis (GSEA) of colonic epithelium RNAseq data showing enrichment of genes in HF/DSS treated or HS/DSS treated mice for gene sets as indicated.

(C) PCA plot showing variance across groups with percentages on axes representing percent variance explained by each principle component.

(D, F) Volcano plots highlight significantly differentially expressed genes in red (absolute fold change greater than 1.5, \* $P<0.05$  and FDR<0.25). Specific genes are called out with arrows.

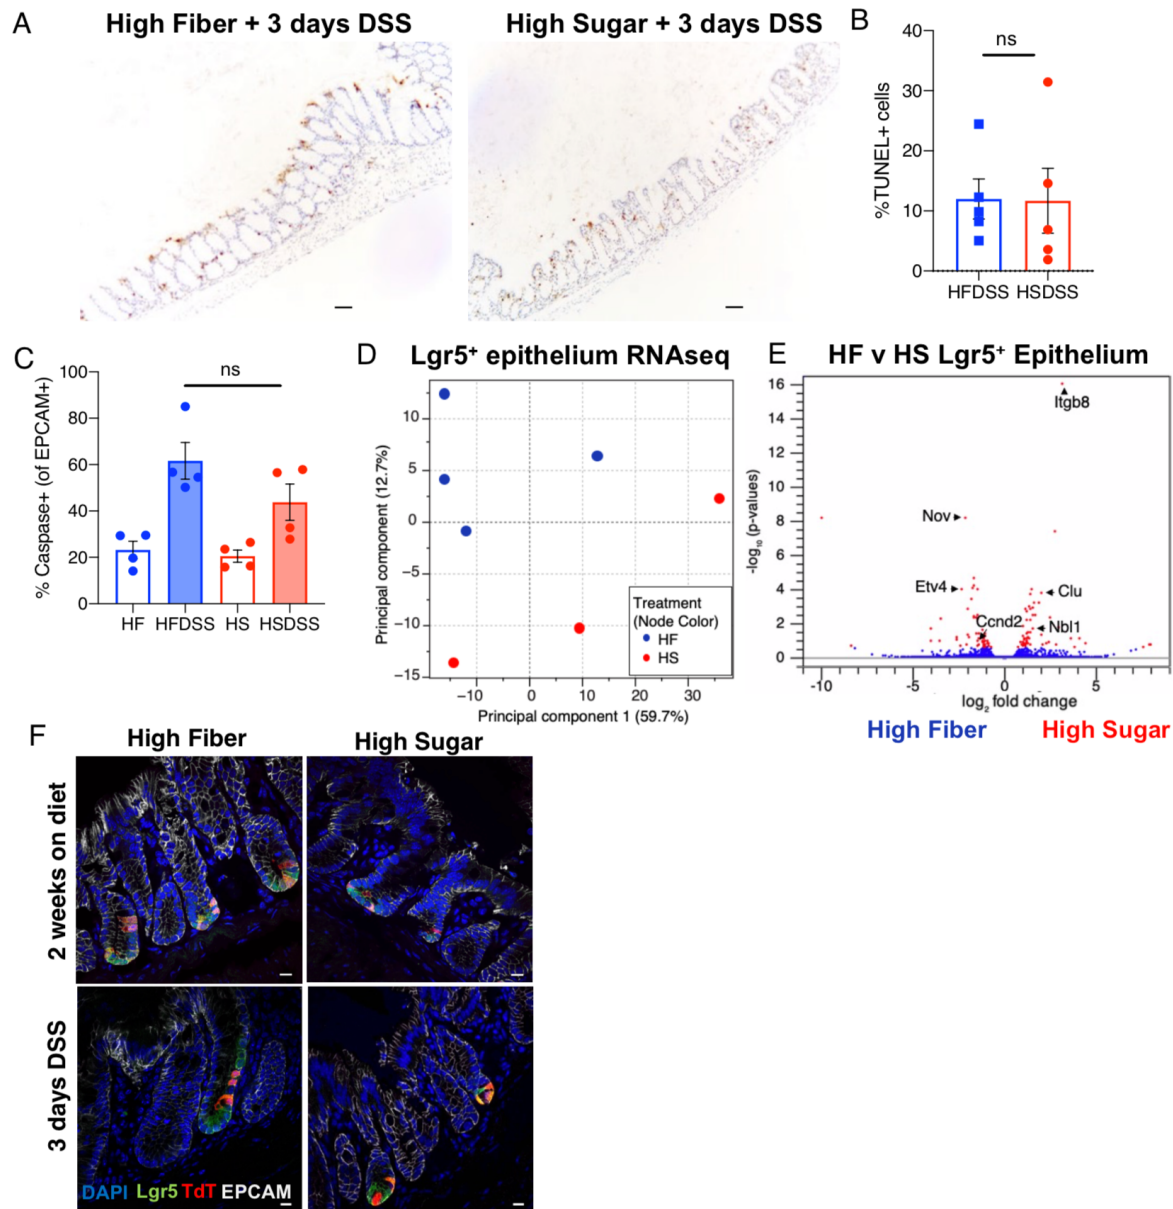

1306  
1307  
1308  
1309  
1310  
1311  
1312  
1313  
1314  
1315  
1316  
1317  
1318  
1319  
1320  
1321  
1322

**Fig. S5.** High sugar diet does not induce greater epithelial cell death, rather the transcriptome of intestinal stem cells is directly affected by excess sugar.

(A) Representative TUNEL (Terminal deoxynucleotidyl transferase dUTP nick end labeling) of colonic sections after 3 days of 3% DSS treatment in HF and HF-fed mice. Images were taken at  $\times 10$  magnification, scale bars represent  $100\mu\text{m}$ .

(B) Percent of cells that are TUNEL<sup>+</sup>. Data are representative of one experiment (n=5) and data points represent individual mouse and error bars represent SEM.

(C) Mice were fed HS or HF diet and treated 3 days with 3% DSS, colonic epithelium was isolated stained with Caspase-3 for flow cytometry analysis. Data represent percent of EPCAM<sup>+</sup> cells that are Caspase-3<sup>+</sup> and are representative of two independent experiments (n=4).

(D-E) Lgr5<sup>+</sup> (GFP<sup>+</sup>) colonic epithelial cells were sorted from HS or HF-fed *Lgr5<sup>eGFP-cre-ERT2</sup>* reporter female mice and analyzed by RNAseq (n=3-4). (D) PCA plot showing variance across groups with percentages on axes representing percent variance explained by each principle component. (E) Volcano plots highlight significantly differentially expressed genes in blue (absolute fold change greater than 1.5, \**P*<0.05 and FDR<0.25). Distinct genes are called out with arrows.

1323 (F)  $Lgr5^{eGFP-Cre-ERT2} Rosa^{LSL-TdTomato}$  mice were fed HS or HF diet for 2 weeks, injected with tamoxifen on day  
1324 1 of DSS treatment and sacrificed on day 3 of DSS for  $Lgr5^+$  ISC lineage tracing. Representative images  
1325 of colonic crypts with  $Lgr5^{eGFP}$  (green) and  $Tomato^+$  progeny (red). Images were taken at 60X magnification,  
1326 scale bars represent  $10\mu m$ .

1327  
1328  
1329  
1330  
1331  
1332  
1333  
1334  
1335  
1336  
1337  
1338  
1339  
1340  
1341

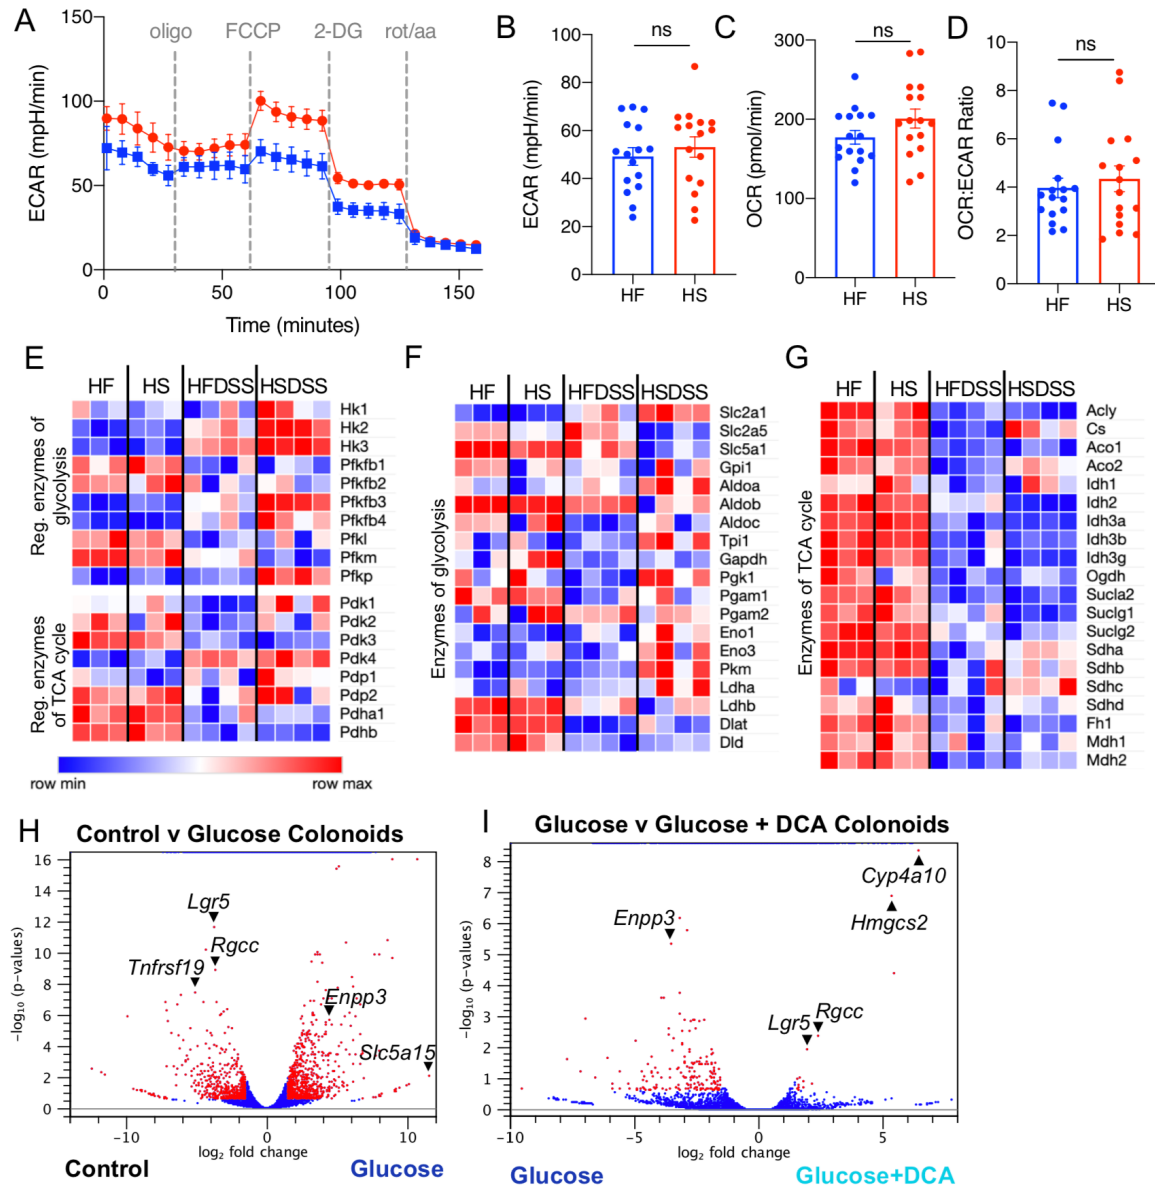

1342  
1343  
1344  
1345  
1346  
1347  
1348  
1349  
1350  
1351  
1352  
1353  
1354  
1355  
1356  
1357  
1358

**Fig. S6.** High sugar diet alters the metabolism colonic crypt epithelial cells.

(A-D) Colonic crypts were isolated from HS or HF-fed mice. (A) Representative trace of extracellular acidification rate (ECAR) of crypts after 30 minutes of equilibration. (B-C) Tabulated data represents basal OCR and ECAR after 30 minutes equilibration (from OCR trace in Fig. 4A). (D) OCR to ECAR ratio, using basal rates from (B) and (C).

(E-G) Heatmap of (E) rate-limiting enzymes in glycolysis and TCA pathways, (F) enzymes of glycolysis and (G) TCA cycle pathway from RNAseq of colonic epithelium from HS or HF-fed mice, with and without 3 days of 3% DSS treatment, where red and blue represent high or low expression level, respectively, normalized across rows.

(H-I) Isolated colonic crypts were cultured in no-added sugar (Control) or 70mM of glucose (Glucose), with or without DCA (dichloroacetate) for 4 days. Colonoids were isolated in Trizol and analyzed via RNAseq. Volcano plots highlight significantly differentially expressed genes in red (absolute fold change greater than 1.5,  $p < 0.05$  and  $FDR < 0.25$ ) for (H) Control versus Glucose treated and (I) Glucose versus Glucose/DCA treated colonoids. Distinct genes are called out with arrows.
